1 *Agrobacterium tumefaciens* divisome proteins regulate the transition from polar growth to cell  
2 division

3 Matthew Howell<sup>1</sup>, Alena Aliashkevich<sup>2</sup>, Kousik Sundararajan<sup>3</sup>, Jeremy J. Daniel<sup>1</sup>, Patrick J.  
4 Lariviere<sup>3</sup>, Erin D. Goley<sup>3</sup>, Felipe Cava<sup>2</sup>, and Pamela J.B. Brown<sup>1#</sup>

5 <sup>1</sup>Division of Biological Sciences, University of Missouri, Columbia, MO, 65203

6 <sup>2</sup>Department of Molecular Biology. Laboratory for Molecular Infection Medicine Sweden  
7 (MIMS), Umeå Centre for Microbial Research, Umeå University, Umeå, Sweden

8 <sup>3</sup>Department of Biological Chemistry, Johns Hopkins University School of Medicine, Baltimore,  
9 MD 21205

10 #Address correspondence to Pamela J.B. Brown, [brownpb@missouri.edu](mailto:brownpb@missouri.edu)

## 11 **Abstract**

12 The mechanisms that restrict peptidoglycan biosynthesis to the pole during elongation and re-  
13 direct peptidoglycan biosynthesis to mid-cell during cell division in polar-growing  
14 Alphaproteobacteria are largely unknown. Here, we demonstrate that although two of the three  
15 FtsZ homologs localize to mid-cell, exhibit GTPase activity and form co-polymers, only one,  
16 FtsZ<sub>AT</sub>, is required for cell division. We find that FtsZ<sub>AT</sub> is required not only for constriction and  
17 cell separation, but also for the termination of polar growth and regulation of peptidoglycan  
18 synthesis at mid-cell. Depletion of FtsZ in *A. tumefaciens* causes a striking phenotype: cells are  
19 extensively branched and accumulate growth active poles through tip splitting events. When cell  
20 division is blocked at a later stage, polar growth is terminated and ectopic growth poles emerge  
21 from mid-cell. Overall, this work suggests that *A. tumefaciens* FtsZ makes distinct contributions  
22 to the regulation of polar growth and cell division.

23

## 24 **Introduction**

25 The spatial and temporal regulation of cell division is a vital process across bacterial species with  
26 implications in the development of antimicrobial therapies [1]. The cell division process must  
27 coordinate membrane invagination(s), peptidoglycan (PG) biosynthesis and remodeling, and the  
28 physical separation of the two daughter cells, all while maintaining cellular integrity.  
29 Furthermore, cell division must be precisely regulated to be orchestrated with other key cell  
30 cycle processes including cell elongation, DNA replication, and chromosome segregation to  
31 ensure that each daughter cell is of sufficient size and contains a complete genome [2, 3].

32

33 To initiate bacterial cell division, the tubulin-like GTPase, FtsZ, polymerizes and forms a  
34 discontinuous ring-like structure at the future site of cell division [4-10]. The presence of FtsZ at  
35 mid-cell leads to the recruitment of many proteins that function in cell division, collectively  
36 called the divisome [11-14]. The divisome includes cell wall biosynthesis proteins, such as the  
37 penicillin-binding protein, PBP3, and FtsW, which contribute to PG biosynthesis and remodeling  
38 necessary to form new poles in daughter cells [11]. Once the divisome is fully assembled, FtsZ  
39 filaments treadmill along the circumference of the mid-cell, driving the Z-ring constriction [9,  
40 10]. The movement of FtsZ filaments is correlated with the movement of enzymes that function  
41 in septal PG biogenesis. These findings are consistent with the notion that FtsZ not only recruits  
42 enzymes that function in PG biogenesis to mid-cell but also regulates their activities to promote  
43 proper cell wall biogenesis [15-17].

44

45 In most rod-shaped model organisms used to study cell division, a block in cell division leads to  
46 the production of long, smooth filamentous cells. This phenotype suggests that assembly or  
47 activation of some divisome components is necessary not only to enable the cells to divide but  
48 also to stop cellular elongation. Indeed, in *Escherichia coli*, FtsZ (along with the Z-ring  
49 stabilizing proteins FtsA, ZipA, and ZapA) has been proposed to have an early function in the  
50 switch from lateral PG biogenesis to mid-cell PG biosynthesis [18]. Following maturation of the  
51 divisome by recruitment of additional PG remodeling enzymes and cell division proteins, PG  
52 biosynthesis is coordinated with membrane invagination, enabling cells to constrict and separate  
53 [19].

54

55    Conversely to e.g. *E. coli*, polar growing rods in the alphaproteobacterial clade Rhizobiales  
56    exhibit branched morphologies when cell division is blocked [20-27]. Examination of the cell  
57    morphologies resulting from the block in cell division suggests that different types of branched  
58    morphologies arise [28]. Drug treatments that block DNA replication cause an early block in cell  
59    division, resulting in a “Y” morphology in which the branches are formed from existing growth  
60    poles [25, 26]. In contrast, antibiotics that target PBP3 cause mid-cell bulges and branches with  
61    some cells adopting a “T” or “+” morphologies [25, 27]. These observations suggest that polar-  
62    like PG synthesis is redirected to mid-cell when cell division is blocked at a later stage. The  
63    manifestation of two distinct phenotypes during early and late blocks in cell division suggests  
64    that divisome assembly and activation may contribute to termination of polar growth, onset of  
65    mid-cell PG biosynthesis, cell constriction, and ultimately cell separation.

66  
67    In *Agrobacterium tumefaciens*, homologs of FtsZ and FtsA fused to fluorescent proteins localize  
68    at the growth pole during elongation and at mid-cell during division [27, 29, 30]. FtsZ was found  
69    to arrive at mid-cell considerably earlier than FtsA [30], indicating that FtsZ may be able to  
70    initiate Z-ring formation prior to FtsA recruitment to the divisome. This observation is consistent  
71    with the described order of divisome assembly in *Caulobacter crescentus* [31] and suggests that  
72    a distinctive time-dependent role of these proteins in cell division.

73  
74    Here, we take advantage of the ability to deplete essential proteins in *A. tumefaciens* [32] to  
75    explore the function of cell division proteins FtsZ, FtsA, and FtsW in a polar growing  
76    alphaproteobacterium. Although the genome of *A. tumefaciens* encodes three FtsZ homologs, we

77 find that only one, henceforth referred to as FtsZ<sub>AT</sub>, is essential for cell survival. FtsZ<sub>AT</sub> is  
78 required to recruit division proteins to mid-cell and likely regulates the activity of PG  
79 biosynthesis enzymes at mid-cell. In the absence of FtsZ<sub>AT</sub>, cells not only fail to divide but are  
80 also unable to terminate polar growth. Depletion of either FtsA or FtsW also causes a block in  
81 cell division, but unlike FtsZ<sub>AT</sub> depletion, growth at the poles is halted and instead, polar-like PG  
82 synthesis is redirected to mid-cell. These observations suggest that only FtsZ is required to  
83 terminate polar growth and initiate cell division-specific PG biosynthesis at mid-cell, whereas  
84 FtsZ, FtsA, and FtsW are exclusively required for cell division. Together these findings suggest  
85 that *A. tumefaciens* uses sequential regulation of cell division, a theme that is broadly conserved  
86 in bacteria.

87

## 88 **Results and Discussion**

89 **FtsZ<sub>AT</sub> is required for cell division and termination of polar growth.** *Agrobacterium*  
90 *tumefaciens* contains three homologs of *Escherichia coli*'s FtsZ, Atu\_2086, Atu\_4673, and  
91 Atu\_4215 (Figure 1A) [27]. *E. coli* FtsZ is comprised of three regions: the conserved N-terminal  
92 tubulin-like GTPase domain, a C-terminal linker (CTL), and a conserved C-terminal peptide  
93 (CTP), which anchors FtsZ to the membrane via interactions with FtsA [33]. Atu\_2086 contains  
94 each of these domains out of which the GTPase domain and CTP share 52% and 67% identity to  
95 their respective domain in *E. coli* FtsZ, whereas the CTL is extended in length [27]. The gene  
96 encoding Atu\_2086 is found in a putative operon with genes encoding DdlB, FtsQ, FtsA [34, 35]  
97 and is predicted to be essential for cell survival based on saturating transposon mutagenesis [36].  
98 Atu\_2086 localizes to mid-cell in wildtype (WT) pre-divisional cells (Figure 1B) [27, 29];  
99 consistent with a role in cell division. Atu\_4673 (called FtsZ<sub>1</sub>; consistent with the genome

100 annotation) contains a complete GTPase domain with 49% identity to tubulin domain of *E. coli*  
101 FtsZ but lacks both the CTL and CTP [27]. Although Atu\_4673 is not predicted to be required  
102 for cell survival based on saturating transposon mutagenesis [36], it localizes to mid-cell in pre-  
103 divisional cells, suggesting a possible role in cell division (Figure 1B). Atu\_4215 (termed FtsZ<sub>3</sub>  
104 in this work) contains a partial GTPase domain with 48% identity to the N-terminal portion of  
105 the *E. coli* FtsZ tubulin domain and lacks both the CTL and CTP [27]. FtsZ<sub>3</sub> is not essential for  
106 survival of *A. tumefaciens* based on saturating transposon mutagenesis [36] and exhibits a diffuse  
107 localization pattern (Figure 1B). Together, these data suggest that Atu\_2086 is the canonical  
108 FtsZ protein required for cell division, and this protein will be referred to as FtsZ<sub>AT</sub> throughout  
109 this work (although it is annotated as FtsZ<sub>2</sub> in the *A. tumefaciens* C58 genome [34, 35]).

110

111 To characterize the function of each FtsZ homolog, we constructed deletions of *ftsZ<sub>1</sub>* and *ftsZ<sub>3</sub>*  
112 and a depletion strain of *ftsZ<sub>AT</sub>*. Since we were unable to construct a deletion of *ftsZ<sub>AT</sub>*, we used a  
113 depletion strategy in which *ftsZ<sub>AT</sub>* is present as a single copy under the control of an isopropyl β-  
114 D-1-thiogalactopyranoside (IPTG) inducible promoter at a neutral site in the chromosome [21,  
115 32]. Using western blot analysis, we have confirmed the depletion of FtsZ<sub>AT</sub> in the absence of  
116 IPTG (Figure 1- Figure Supplement 1A).

117

118 Deletion of *ftsZ<sub>1</sub>* or *ftsZ<sub>3</sub>* does not impact cell viability (Figure 1C), cell morphology (Figure 1D;  
119 Table 1; Figure 1-Figure Supplement 1B), microcolony formation (Figure 1D), constriction rate  
120 or position (Table 1) when compared to WT cells. Similarly, when FtsZ<sub>AT</sub> is expressed in the  
121 depletion strain (labeled in Figures as +FtsZ<sub>AT</sub>) the cells remain viable (Figure 1C), are similar in

122 size to WT cells (Table 1), properly position constrictions (Table 1), and form microcolonies  
 123 (Figure 1D). In contrast, depletion of FtsZ<sub>AT</sub> (labeled in Figures as -FtsZ<sub>AT</sub>) causes a marked  
 124 decrease in cell viability (Figure 1C) and triggers the formation of large cells with complex  
 125 branched morphologies (Table 1; Figure 1D). To quantify changes in morphology during  
 126 depletion of FtsZ<sub>AT</sub>, the cell area of at least 100 cells was calculated based on phase contrast  
 127 images of cells acquired immediately after removal of the inducer (-FtsZ<sub>AT</sub> 0 h), 8 h after  
 128 removal of the inducer (-FtsZ<sub>AT</sub> 8 h), and 14 h after removal of the inducer (-FtsZ<sub>AT</sub> 14 h) (Table  
 129 1, Figure 1- Figure Supplement 1C). Initially, the FtsZ<sub>AT</sub> depleted cells are similar to WT in cell  
 130 size, but after 8 h of FtsZ<sub>AT</sub> depletion the cell area has nearly doubled (Table 1, Figure 1- Figure  
 131 Supplement 1C). Within 14 h of FtsZ<sub>AT</sub> depletion, the average cell area has dramatically  
 132 increased (Table 1, Figure 1- Figure Supplement 1C). Together, these results demonstrate that  
 133 only the FtsZ<sub>AT</sub> homolog is required for proper cell growth and division.

|                                    |                                    | <b>Average<br/>Cell Length<sup>a</sup><br/>(<math>\mu\text{m}</math> +/- SD<sup>b</sup>)</b> | <b>Average<br/>Cell Area<sup>a</sup><br/>(<math>\mu\text{m}^2</math> +/- SD)</b> | <b>Average<br/>Constriction Rate<sup>c</sup><br/>(nm/min +/- SD)</b> | <b>Relative<br/>Constriction<br/>Position<sup>d</sup><br/>+/- SD</b> |
|------------------------------------|------------------------------------|----------------------------------------------------------------------------------------------|----------------------------------------------------------------------------------|----------------------------------------------------------------------|----------------------------------------------------------------------|
|                                    | WT                                 | 2.31 +/- .50                                                                                 | 1.66 +/- .35                                                                     | 6.82 +/- 3.19                                                        | .49 +/- .05                                                          |
|                                    | $\Delta ftsZ_1$                    | 2.25 +/- .49                                                                                 | 1.52 +/- .33                                                                     | 6.99 +/- 3.58                                                        | .46 +/- .05                                                          |
|                                    | $\Delta ftsZ_3$                    | 2.24 +/- .47                                                                                 | 1.44 +/- .30                                                                     | 6.77 +/- 2.77                                                        | .46 +/- .05                                                          |
|                                    | $\Delta ftsZ_1$<br>$\Delta ftsZ_3$ | 2.25 +/- .51                                                                                 | 1.47 +/- .34                                                                     | 6.61 +/- 3.75                                                        | .46 +/- .04                                                          |
| <i>ftsZ<sub>AT</sub></i> depletion | -<br>FtsZ <sub>AT</sub><br>0 h     | 2.71 +/- .70                                                                                 | 1.56 +/- .39                                                                     | 6.38 +/- 2.81                                                        | .49 +/- .07                                                          |
|                                    | -<br>FtsZ <sub>AT</sub><br>8 h     | ND <sup>e</sup>                                                                              | 2.95 +/- 1.12                                                                    | ND                                                                   | ND                                                                   |
|                                    | -<br>FtsZ <sub>AT</sub><br>14 h    | ND                                                                                           | 11.37 +/- 4.69                                                                   | ND                                                                   | ND                                                                   |

134 **Table 1. Quantitation of cell size and constriction of *ftsZ* mutants**

135 <sup>a</sup>At least 100 cells were used to quantify the cell length and area for each strain

136 <sup>b</sup>SD – standard deviation.

137 <sup>c</sup>At least 30 cells were used to quantify the constriction rates for each strain

138 <sup>d</sup>Relative constriction position for at least 40 cells is shown. A value of 0 corresponds to the new  
139 pole, 0.5 corresponds to mid-cell, and a value of 1 corresponds to the old pole.

140 <sup>e</sup>ND – not determined.

141

142 **Deletion of *ftsZ<sub>1</sub>* and *ftsZ<sub>3</sub>* does not change the FtsZ<sub>AT</sub> depletion phenotype.** Since the *ftsZ<sub>1</sub>*  
143 and *ftsZ<sub>3</sub>* single deletions do not have an obvious impact on cell morphology, growth, or division,  
144 we constructed double and triple mutants to determine if there is an increasing effect when  
145 removing multiple *ftsZ* homologs. Double deletion of *ftsZ<sub>1</sub>* and *ftsZ<sub>3</sub>* does not cause a decrease in  
146 cell viability (Figure 2A, top panel), cell morphology (Table 1), or microcolony formation  
147 (Figure 2A, bottom panel). Furthermore,  $\Delta$ *ftsZ<sub>1</sub>*  $\Delta$ *ftsZ<sub>3</sub>* cells properly place constrictions and have  
148 an average constriction rate similar to WT (Table 1). Next, we introduced the  $\Delta$ *ftsZ<sub>1</sub>*,  $\Delta$ *ftsZ<sub>3</sub>*, and  
149  $\Delta$ *ftsZ<sub>1</sub>*  $\Delta$ *ftsZ<sub>3</sub>* mutations into the *ftsZ<sub>AT</sub>* depletion strain to determine if loss of multiple *ftsZ*  
150 homologs further aggravated the *ftsZ<sub>AT</sub>* depletion phenotypes. The combination of the *ftsZ<sub>AT</sub>*  
151 depletion strain with  $\Delta$ *ftsZ<sub>1</sub>*,  $\Delta$ *ftsZ<sub>3</sub>*, or  $\Delta$ *ftsZ<sub>1</sub>*  $\Delta$ *ftsZ<sub>3</sub>* mutations did not result in a further decrease  
152 in cell viability (Figure 2B, top panel) or a worsening of cell morphology (Figure 2B, bottom  
153 panel) when compared to FtsZ<sub>AT</sub> depletion alone. Together, these results suggest that the FtsZ<sub>1</sub>  
154 and FtsZ<sub>3</sub> homologs do not have a major impact on cell division under the conditions tested.

155

156 *ftsZ* gene duplications have occurred independently in several alphaproteobacterial lineages and  
157 in chloroplasts and some mitochondria [37]. In most of the cases that have been studied, one



158 FtsZ homolog plays a canonical role in cell or organelle division while the other plays a  
159 regulatory or specialized role. However, little is known about the roles of multiple ftsZs in  
160 certain alphaproteobacteria species. In both *Rhizobium meliloti* and *Magnetospirillum*  
161 *gryphiswaldense*, one of the FtsZs (containing a CTL and CTP similar to FtsZ<sub>AT</sub>) is essential and  
162 the other (truncated after the GTPase domain similar to FtsZ<sub>1</sub>) is dispensable [38, 39]. In the case  
163 of *M. gryphiswaldense*, the truncated *ftsZ* is dispensable for division but important for  
164 biomineralization in this magnetotactic species under certain growth conditions. Similarly, it is  
165 possible that FtsZ<sub>1</sub> or FtsZ<sub>3</sub> may have important contributions to cell growth or division of *A.*  
166 *tumefaciens* in different environments as e.g. in its plant-associated life-style.

167

168 **FtsZ<sub>1</sub> requires FtsZ<sub>AT</sub> to localize to mid-cell and to polymerize *in vitro*.** Since FtsZ<sub>1</sub> localizes  
169 to mid-cell (Figure 1B), we hypothesized that FtsZ<sub>1</sub> may be a nonessential divisome component.  
170 To test this, we examined the localization of FtsZ<sub>1</sub>-sfGFP in both WT and the *ftsZ<sub>AT</sub>* depletion  
171 strain (Figure 3). In WT and FtsZ<sub>AT</sub> induced cells, FtsZ<sub>1</sub>-sfGFP does not localize in newborn  
172 cells but forms FtsZ-like rings at the future site of division in pre-divisional cells (Figure 3A, top  
173 and middle panel). This Z-like ring constricts to form a single focus in dividing cells. These  
174 observations suggest that FtsZ<sub>1</sub> may be a divisome component despite the absence of a cell  
175 division phenotype in the  $\Delta$ *ftsZ<sub>1</sub>* strain. To explore the possibility of interactions arising due to  
176 the loss of FtsZ<sub>1</sub> and FtsZ<sub>AT</sub>, we next visualized FtsZ<sub>1</sub>-sfGFP localization during the depletion of  
177 FtsZ<sub>AT</sub> (Figure 3A, bottom panel). We pre-depleted FtsZ<sub>AT</sub> for 4 h in liquid to avoid cell  
178 crowding caused by division events prior to sufficient FtsZ<sub>AT</sub> depletion. Early during the  
179 depletion of FtsZ<sub>AT</sub>, FtsZ<sub>1</sub>-sfGFP localizes in a FtsZ-like ring near mid-cell. However, as the

180 FtsZ<sub>AT</sub> depletion continues, FtsZ<sub>1</sub>-sfGFP rings and foci progressively fade away, demonstrating  
181 that localization of FtsZ<sub>1</sub>-sfGFP to mid-cell requires the presence of FtsZ<sub>AT</sub>.

182

183 Since FtsZ<sub>1</sub> is recruited to mid-cell by FtsZ<sub>AT</sub>, we hypothesized that FtsZ<sub>AT</sub> and FtsZ<sub>1</sub> may form  
184 co-polymers. To first test the ability of FtsZ<sub>AT</sub> and FtsZ<sub>1</sub> to independently form polymers, each  
185 protein was purified and subjected to polymerization studies. Right angle light scattering assays  
186 of wildtype FtsZ<sub>AT</sub> revealed that this protein exhibits a GTP-dependent increase in light  
187 scattering at concentrations above 2 μM, consistent with its polymerization (Figure 3B, blue  
188 lines). Negative stain transmission electron microscopy (TEM) confirmed that FtsZ<sub>AT</sub> forms  
189 gently curved protofilaments in the presence of GTP (Figure 3C, left panel) and it rapidly  
190 releases inorganic phosphate suggesting that GTP is hydrolyzed (Figure 3D, blue lines;  $4.7 \pm 0.2$   
191 GTP min<sup>-1</sup> FtsZ<sup>-1</sup> at 8 μM FtsZ<sub>AT</sub>, n=3). Surprisingly, we did not observe polymerization of  
192 wildtype FtsZ<sub>1</sub>, even at high protein concentrations either in light scattering (Figure 3B, red line),  
193 TEM (Figure 3C, center panel), or GTP hydrolysis assays (Figure 3D, red line).

194

195 In light of the dependence of FtsZ<sub>1</sub> on FtsZ<sub>AT</sub> for mid-cell localization, we next sought to  
196 determine if FtsZ<sub>AT</sub> and FtsZ<sub>1</sub> can form co-polymers. To conduct these experiments, FtsZ<sub>1</sub>-  
197 L71W and FtsZ<sub>AT</sub>-L72W were purified to enable monitoring of protein polymerization using  
198 tryptophan fluorescence. The leucine to tryptophan mutation introduces a tryptophan on the  
199 surface of FtsZ that increases in fluorescence when it is buried in the subunit interface upon  
200 polymerization [40]. While wildtype FtsZ<sub>AT</sub> (with no tryptophan) does not change in  
201 fluorescence on addition of GTP (Figure 3E, solid blue line), FtsZ<sub>AT</sub>-L72W fluorescence

202 increases rapidly after GTP addition reflecting polymerization (Figure 3E, dashed blue line).  
203 When wildtype FtsZ<sub>AT</sub> is added to FtsZ<sub>AT</sub>-L72W, bringing the total FtsZ concentration to 8 μM,  
204 fluorescence again increases, but then drops back to baseline upon complete consumption of  
205 GTP by this high concentration of FtsZ (Figure 3E, dotted blue line). Conversely, on its own or  
206 combined with wildtype FtsZ<sub>1</sub>, FtsZ<sub>1</sub>-L71W maintains a constant tryptophan fluorescence level  
207 before and after addition of GTP, consistent with our conclusion that it does not polymerize on  
208 its own (Figure 3E, red lines). Remarkably, tryptophan fluorescence increases when FtsZ<sub>1</sub>-L71W  
209 and FtsZ<sub>AT</sub> are mixed, indicating that the FtsZ<sub>1</sub>-L71W is incorporated into polymers in the  
210 presence of FtsZ<sub>AT</sub> (Figure 3C, purple dashed line). When FtsZ<sub>AT</sub>-L72W is mixed with FtsZ<sub>1</sub>,  
211 fluorescence increases above the level observed for FtsZ<sub>AT</sub>-L72W alone and drops to baseline  
212 faster than FtsZ<sub>AT</sub>-L72W on its own, again indicating co-polymerization. Finally, equimolar  
213 concentrations of FtsZ<sub>AT</sub> alone or mixtures of FtsZ<sub>AT</sub> and FtsZ<sub>1</sub> exhibit similar rates of GTP  
214 hydrolysis (Figure 3D) and form qualitatively similar polymers by TEM (Figure 3C, right panel).  
215 Together, these observations indicate that FtsZ<sub>1</sub> cannot polymerize independently, but that  
216 FtsZ<sub>AT</sub> and FtsZ<sub>1</sub> form co-polymers with similar structure and GTP hydrolysis rates as FtsZ<sub>AT</sub>  
217 polymers.

218

219 Though multiple FtsZs are present in a number of bacterial and chloroplast lineages, their co-  
220 assembly properties have only begun to be characterized. In contrast to our observations, each of  
221 the FtsZs of *M. gryphiswaldense* was able to independently polymerize *in vitro*, but they also  
222 appeared to directly interact, perhaps reflecting an ability to co-polymerize [39]. Chloroplast  
223 FtsZs from *Arabidopsis thaliana* are also able to co-polymerize and, at least under some  
224 conditions, to independently polymerize [41]. Conversely, one of the FtsZs from tobacco

225 chloroplasts cannot polymerize on its own but promotes polymerization of its partner homolog  
226 [42]. Finally, the FtsZ pair from the chloroplasts of representative green and red algae co-  
227 polymerize into polymers with altered assembly dynamics from either homopolymer [43]. It is  
228 likely that in each of these cases, the assembly or co-assembly properties of the duplicated FtsZs  
229 have evolved to suit a niche regulatory function. We hypothesize the FtsZ<sub>1</sub> from *A. tumefaciens*  
230 has low affinity for itself, but higher affinity for FtsZ<sub>AT</sub>, limiting its homopolymerization but  
231 allowing for co-polymerization both *in vitro* and in cells. Since FtsZ<sub>1</sub> cannot polymerize  
232 independently, FtsZ<sub>AT</sub> must first polymerize at mid-cell after which FtsZ<sub>1</sub> can be recruited by co-  
233 polymerization. The biological relevance of these biochemical and cell biological properties  
234 awaits further study.

235

236 **FtsZ<sub>AT</sub> depletion results in tip splitting events.** Once we identified FtsZ<sub>AT</sub> as the primary  
237 homolog involved in cell division we next analyzed the growth phenotype during FtsZ<sub>AT</sub>  
238 depletion more carefully. Compared to FtsZ<sub>AT</sub> induced cells (Figure 4A, top), observation of  
239 cells during FtsZ<sub>AT</sub> depletion by time-lapse microscope reveals remarkable changes in cell  
240 morphology (Figure 4A, bottom; Movie 1). Early during the depletion of FtsZ, an ectopic pole  
241 forms near mid-cell. We hypothesize that this occurs due to the ability of the remaining FtsZ to  
242 identify the mid-cell and recruit PG biosynthesis machinery to that site. Both the original growth  
243 pole and the ectopic pole are growth-active, resulting in the presence of multiple growth poles.  
244 These growth poles are unable to terminate cell elongation and ultimately most growth active  
245 poles are split, leading to the accumulation of many growth active poles (Figure 4A, bottom;  
246 Movie 1) and the rapid increase in cell area until the cell lyses.

247

248 The branched morphology observed during FtsZ<sub>AT</sub> depletion is in stark contrast to FtsZ depletion  
249 observed in other organisms. In species like *E. coli* and *B. subtilis*, which utilize laterally  
250 localized peptidoglycan biosynthesis during elongation, depletion of FtsZ results in long, smooth  
251 filamentous cells. We hypothesize that the branching morphology of the *A. tumefaciens* FtsZ<sub>AT</sub>  
252 depletion strain can be attributed to polar elongation. During the block in cell division, the  
253 growth pole continues to grow and presumably recruits additional peptidoglycan biosynthesis  
254 proteins. This could lead to an over-accumulation of elongasome proteins causing the pole to  
255 split into two poles. A similar branching pattern has been characterized during typical growth of  
256 *Streptomyces coelicolor* [44]. In this polar growing bacterium, the established elongasome splits,  
257 leaving a small portion of the elongasome behind as growth continues. With time, the subpolar  
258 elongasome accumulates in size and eventually forms a new growth pole. Although the polar  
259 growth molecular mechanisms are not conserved between *A. tumefaciens* and *S. coelicolor*, the  
260 fundamental principle of tip splitting as a consequence of polar growth appears to be shared.

261

262 **PopZ-YFP accumulates at growth poles in the absence of FtsZ<sub>AT</sub>.** In WT *A. tumefaciens*,  
263 deletion of *popZ* has been shown to cause ectopic poles and cells devoid of DNA, demonstrating  
264 a role in coordinating cell division with chromosome segregation [45, 46]. We hypothesize that  
265 PopZ-dependent coordination of cell division likely involves FtsZ. In WT, PopZ-YFP localizes  
266 to the growing pole during elongation and is recruited to mid-cell just prior to cell separation  
267 (Figure 4B, top panel) [45-47]. When FtsZ<sub>AT</sub> is expressed in the *ftsZ<sub>AT</sub>* depletion strain, PopZ-  
268 YFP has a similar localization pattern as in WT cells (Figure 4B, middle panel). When FtsZ<sub>AT</sub> is  
269 depleted, PopZ-YFP stays at the growth poles and as tip splitting events lead to the production of  
270 new growth poles, PopZ-YFP appears to be split and retained at all growth active poles (Figure

271 4B, bottom panel). These observations indicate that FtsZ is required for mobilizing PopZ from  
272 the growth pole to mid-cell. Remarkably, both FtsZ and FtsA are mislocalized in the absence of  
273 PopZ, leading to the establishment of asymmetric constrictions sites and a broad range of cell  
274 lengths [45]. Together, these data suggest that the presence of both PopZ and FtsZ are important  
275 for proper positioning and functioning of the divisome.

276

277 In addition to its function in maintaining proper cell division, *A. tumefaciens* PopZ is also  
278 required for chromosome segregation and tethers the centromere of at least one chromosome to  
279 the growth pole [46]. Thus, we examined the DNA content of cells depleted of FtsZ<sub>AT</sub>. In both  
280 WT cells and in conditions where *ftsZ<sub>AT</sub>* is induced in the *ftsZ<sub>AT</sub>* depletion strain, DNA labeled  
281 with Sytox orange is diffuse throughout most cells (Figure 4C, top two panels). In late divisional  
282 cells, true separation of nucleoids is observed indicating successful completion of chromosome  
283 segregation (Figure 4C, marked with an asterisk in the top two panels). In cells depleted of  
284 FtsZ<sub>AT</sub> for both 8 and 14 h, DNA is diffuse throughout the elongated branches (Figure 4C,  
285 bottom two panels). The absence of distinct nucleoids may suggest that final stages of  
286 chromosome segregation are coordinated with cell separation as has been described for other  
287 bacteria including *E. coli* and *C. crescentus* [48].

288

289 To look more carefully at genomic content, we visualized YFP-ParB1, which serves as a proxy  
290 to track centromere partitioning in *A. tumefaciens* [46], in WT and *ftsZ<sub>AT</sub>* depletion cells. In both  
291 WT cells and cells expressing FtsZ<sub>AT</sub> in the *ftsZ<sub>AT</sub>* depletion strain, a single YFP-ParB1 focus is  
292 present at the old pole in new cells generated by a recent cell division event (Figure 4D, top and

293 middle panels). As the cells elongate, a second focus appears and translocates across the  
294 longitudinal axis to the growing pole (Figure 4D, top and middle panels). After 4 h of FtsZ<sub>AT</sub>  
295 pre-depletion, YFP-ParB1 foci can be seen at both poles, but when the cell fails to divide, a third  
296 focus of YFP-ParB1 appears and translocates along the longitudinal axis of the cell before taking  
297 a rapid turn toward a new ectopic pole formed from near mid-cell (Figure 4D, bottom panel).  
298 Next, we quantified the number of YFP-ParB1 foci relative to cell area (Figure 4E). In WT and  
299 FtsZ<sub>AT</sub> expressing cells in the *ftsZ<sub>AT</sub>* depletion strain, small cells have only a single focus of YFP-  
300 ParB1. This is followed by a transition period in which elongating cells accumulate a second  
301 focus of YFP-ParB1. Finally, the largest, pre-divisional cells have two YFP-ParB1 foci (Figure  
302 4E). Cells depleted of FtsZ<sub>AT</sub> for 8 h accumulate YFP-ParB1 foci as they increase in area (Figure  
303 4E). Cells with an area larger than 3  $\mu\text{m}^2$  all have at least 2 YFP-ParB1 foci, suggesting that  
304 chromosome replication is not blocked during FtsZ depletion. Furthermore, in larger cells  
305 additional YFP-ParB1 foci accumulate. These data suggest that cell division is not strictly  
306 required for the initiation of DNA replication in *A. tumefaciens*, although completion of  
307 chromosome segregation may be coordinated with cell division.

308

309 **Loss of septal PG synthesis results in altered total PG composition.** Since polar growth  
310 appears to continue in the absence of FtsZ (Figure 4A, bottom panel), we used fluorescent-D-  
311 amino acids (FDAAs), to probe sites enriched in peptidoglycan synthesis [49] during depletion  
312 of FtsZ<sub>AT</sub>. In WT cells, FDAAs localize at a single pole in elongating cells and at mid-cell in pre-  
313 divisional cells (Figure 5A) [49]. As FtsZ<sub>AT</sub> is depleted, FDAAs are targeted strictly to the poles,  
314 confirming that polar peptidoglycan synthesis is responsible for the observed increase in cell  
315 biomass after 8 h and 14 h of depletion (Figure 5A).

316

317 Since cells depleted of FtsZ<sub>AT</sub> fail to terminate polar growth and do not produce septal  
318 peptidoglycan, we hypothesized that the peptidoglycan composition may reveal chemical  
319 signatures of peptidoglycan derived from polar growth. Thus, we characterized the  
320 peptidoglycan composition of both WT cells and the *ftsZ<sub>AT</sub>* depletion strain in both the presence  
321 and absence of IPTG using ultra-performance liquid chromatography (UPLC) [50]. The major  
322 muropeptides found in WT *A. tumefaciens* PG and their quantification are shown in (Figure 5-  
323 Figure Supplement 1) and include monomeric (M), dimeric (D), and trimeric (T) muropeptides.  
324 The muropeptide composition and abundance is similar between WT cells, WT cells grown in  
325 the presence of IPTG, and the *ftsZ<sub>AT</sub>* depletion strain grown in the presence of IPTG such that  
326 FtsZ<sub>AT</sub> is expressed (Figure 5- Figure Supplement 1). These findings suggest that there are no  
327 major changes in PG composition due to IPTG and that the presence of IPTG leads to  
328 complementation in the *ftsZ<sub>AT</sub>* depletion strain. In contrast, when the *ftsZ<sub>AT</sub>* depletion strain is  
329 grown in the absence of IPTG for 14 h, marked changes in muropeptide composition are  
330 observed (Figure 5B-D). While the overall abundance of monomeric, dimeric, and trimeric  
331 muropeptides are not dramatically impacted (Figure 5C), the abundance of specific muropeptides  
332 is modified. When FtsZ<sub>AT</sub> is depleted, there is a significant increase in monomeric disaccharide  
333 tripeptide (M3) and a decrease in the abundance of the monomeric disaccharide tetrapeptide M4  
334 (Figure 5B). This observation is consistent with the possibility that the absence of FtsZ<sub>AT</sub> leads to  
335 an increase in LD-carboxypeptidase activity, which would remove the terminal peptide from M4,  
336 leading to both a reduction in the levels of M4 and an increase in the abundance in M3.  
337 Following FtsZ<sub>AT</sub> depletion, the overall degree of muropeptide crosslinking decreases (Figure  
338 5D). In particular, there is a marked decrease in DD-crosslinkages, which are formed by the DD-



339 transpeptidase activity associated with penicillin-binding proteins (PBPs). The dominant dimeric  
340 muropeptide formed in the presence of FtsZ<sub>AT</sub> is D44, which contains a DD-crosslink; in contrast,  
341 the dominant dimer formed in the absence of FtsZ<sub>AT</sub> is D33, which contains an LD-crosslink  
342 (Figure 5B). These data suggest that the activity of LD-transpeptidases is increased and the  
343 activity of PBP-mediated DD-transpeptidases is decreased during FtsZ<sub>AT</sub> depletion. The increased  
344 pool of M3 may provide additional acceptor substrate for LD-transpeptidases to increase the  
345 production of D33 relative to D44. In addition, increased LD-carboxypeptidase activity could  
346 contribute to increase further the levels of D33 using D34 as a substrate.

347

348 The *A. tumefaciens* genome contains 14 LD-transpeptidases, 7 of which are specific to  
349 Rhizobiales. The Rhizobiales-specific LD-transpeptidase encoded by *Atu\_0845* (referred to here  
350 as LDTP<sub>0845</sub>) has been shown to localize to the growing pole in WT cells and has been  
351 hypothesized to contribute to polar growth [30]. This localization pattern was confirmed in both  
352 WT and FtsZ<sub>AT</sub> induced cells (Figure 5E, top and middle panels). We find that LDTP<sub>0845</sub>  
353 localizes at growth poles during depletion of FtsZ<sub>AT</sub> (Figure 5E, bottom). This observation  
354 suggests that this LDTP<sub>0845</sub> may contribute to changes in PG composition during FtsZ<sub>AT</sub>  
355 depletion and supports a potential role for LD-transpeptidases in polar growth during elongation.  
356 The localization and function of putative periplasmic LD-carboxypeptidases in *A. tumefaciens*  
357 remain to be explored. Overall, these findings suggest that LD-carboxypeptidase and LD-  
358 transpeptidase activities are increased during FtsZ<sub>AT</sub> depletion, indicating that these classes of  
359 enzymes may contribute to polar growth of *A. tumefaciens*.

360

361 **The C-terminal Conserved Peptide (CTP) of FtsZ<sub>AT</sub> is required for proper termination of**  
362 **polar growth.** To better understand the mechanism by which FtsZ<sub>AT</sub> terminates polar growth,  
363 we constructed truncated proteins to analyze the function of the C-terminal conserved peptide  
364 (CTP) and the C-terminal linker (CTL) (Figure 1A). The CTP is a highly conserved domain  
365 which binds to proteins such as FtsA, that tether FtsZ to the membrane [37, 51, 52]. The CTL is  
366 an intrinsically disordered region of variable length found in FtsZ proteins, which functions in  
367 the regulation of PG biosynthesis and protofilament assembly [17, 53-55]. To probe the function  
368 of the FtsZ<sub>AT</sub> CTP and CTL domains, we expressed FtsZ<sub>AT</sub>ΔCTP and FtsZ<sub>AT</sub>ΔCTL in both WT  
369 and FtsZ<sub>AT</sub> depletion backgrounds.

370  
371 In order to execute these experiments, we constructed a vector with an alternative “inducible”  
372 promoter system, which is compatible with the chromosomal IPTG depletion system. We  
373 modified pSRKKm [56] by replacing *lacI<sup>q</sup>* with the gene encoding the cumate responsive  
374 repressor CymR [57, 58] and replacing the *lacO* operator sites with *cuO* operator sites (Figure 6-  
375 Figure Supplement 1A). This approach allows the same promoter to drive expression of both  
376 chromosomal full-length *ftsZ<sub>AT</sub>* using IPTG and plasmid-encoded *ftsZ* variants using cumate. For  
377 simplicity, henceforth we referred to IPTG induction as mediated by P<sub>lac</sub> and cumate induction as  
378 mediated by P<sub>cym</sub>. Expression of sfGFP from P<sub>cym</sub> requires the presence of cumate (Figure 6-  
379 Figure Supplement 1B) and is comparable to expression of sfGFP from P<sub>lac</sub> (Figure 6- Figure  
380 Supplement 1C). Although higher concentrations of cumate inhibit growth of WT *A.*  
381 *tumefaciens*, 0.01 mM cumate does not impair growth of WT cells (Figure 6- Figure Supplement  
382 1D; left) and is sufficient to complement growth of the *ftsZ<sub>AT</sub>* depletion strain in the absence of  
383 IPTG (Figure 6- Figure Supplement 1D; right).

384

385 In the *ftsZ<sub>AT</sub>* depletion strain, we introduced 4 vectors: an empty vector with P<sub>cym</sub> (pEmpty), P<sub>cym</sub>-  
386 *ftsZ<sub>AT</sub>* (pFtsZ<sub>AT</sub>), P<sub>cym</sub>-*ftsZ<sub>AT</sub>ΔCTP* (pFtsZ<sub>ΔCTP</sub>) or P<sub>cym</sub>-*ftsZ<sub>AT</sub>ΔCTL* (pFtsZ<sub>ΔCTL</sub>). When full-length  
387 *ftsZ<sub>AT</sub>* is expressed from the chromosome, the viability of cells is not impacted by the presence of  
388 the P<sub>cym</sub> vectors (Figure 6A, top left panel). In the absence of induction of *ftsZ* from the  
389 chromosome, the presence of the uninduced P<sub>cym</sub> vectors, including pFtsZ<sub>AT</sub>, is not sufficient to  
390 rescue viability of the FtsZ-depleted cells (Figure 6A, top right panel); however, viability is  
391 significantly restored by expression of plasmid-encoded FtsZ<sub>AT</sub> in the presence of cumate  
392 (Figure 6A, bottom left panel). Expression of plasmid-encoded FtsZ<sub>AT</sub>ΔCTP partially rescues the  
393 depletion of FtsZ<sub>AT</sub> (Figure 6A, bottom left panel). In contrast, expression of plasmid-encoded  
394 FtsZ<sub>AT</sub>ΔCTL does not rescue the depletion of FtsZ<sub>AT</sub> (Figure 6A, bottom left panel) and when  
395 both chromosomal full-length FtsZ<sub>AT</sub> and FtsZ<sub>AT</sub>ΔCTL are expressed, viability is impaired,  
396 suggesting that FtsZ<sub>AT</sub>ΔCTL may have a dominant negative phenotype (Figure 6A, bottom right  
397 panel).

398

399 Next, we observed cell morphology of the *ftsZ<sub>AT</sub>* depletion strain carrying each of the four  
400 vectors under conditions where the chromosomal FtsZ<sub>AT</sub> is depleted and the plasmid-encoded  
401 FtsZ variants are expressed for 6 or 14 h (Figure 6B). The presence of pEmpty does not impact  
402 the FtsZ<sub>AT</sub> depletion phenotype: branched cells with multiple growth active poles are observed  
403 (Figure 6B). Plasmid-encoded FtsZ<sub>AT</sub> rescues the chromosomal FtsZ<sub>AT</sub> depletion, resulting in the  
404 production of typical rod-shaped cells with PG biosynthesis occurring at a single pole or mid-cell  
405 (Figure 6B, middle left). The partial rescue of FtsZ<sub>AT</sub> depletion in viability by expression of  
406 FtsZ<sub>AT</sub>ΔCTP was matched by a less severe defect in cell morphology (Figure 6B, middle right).

407 Although cells are branched, they are much shorter and have fewer branches than FtsZ<sub>AT</sub>  
408 depletion. FDAA labeling reveals that the expression of FtsZ<sub>AT</sub>ΔCTP enables mid-cell labeling  
409 (Figure 6B, middle left), suggesting that PG is synthesized at mid-cell and that some cells may  
410 undergo division. Indeed, time-lapse microscopy of the FtsZ<sub>AT</sub> depletion strain expressing only  
411 FtsZΔCTP reveals that the cells are capable of cell division events (Figure 6C, top panel).  
412 Remarkably, the sites of cell constriction and cell division are often asymmetric, giving rise to a  
413 cell population with a broad length distribution. Furthermore, polar growth is not terminated  
414 efficiently and both polar elongation and tip splitting events are evident. Together, these  
415 observations suggest that the FtsZ CTP contributes to proper termination of polar growth and  
416 divisome assembly. Expression of plasmid-encoded FtsZ<sub>AT</sub>ΔCTL in the absence of chromosome-  
417 encoded FtsZ<sub>AT</sub> gives rise to a distinct cell morphology (Figure 6B, far right panel). After 6  
418 hours of FtsZ<sub>AT</sub>ΔCTL expression, some cells contain mid-cell bulges. Remarkably, in these cells,  
419 FDAA labeling reveals that PG biosynthesis is occurring in the bulges and not at either pole.  
420 After 14 h, most cells have mid-cell swelling and multiple ectopic poles. Time-lapse microscopy  
421 reveals that polar growth is terminated and growth appears to be directed to mid-cell (Figure 6C,  
422 bottom panel, 320 min). When cell division fails, ectopic growth poles emerge from the mid-cell  
423 bulges (Figure 6C, bottom panel 520 min). The ectopic poles elongate, polar growth is  
424 terminated, and new ectopic growth poles are formed near the initial bulge site (Figure 6C,  
425 bottom panel). These observations suggest that the CTL of FtsZ<sub>AT</sub> is required for proper cell  
426 division but is not required for the termination of polar growth.

427

428 **The CTL of FtsZ<sub>AT</sub> is required for proper PG composition.** The mid-cell bulges observed  
429 during FtsZΔCTL expression are reminiscent of those observed when FtsZ<sub>CC</sub>ΔCTL is expressed

430 in *C. crescentus* [17]. In *C. crescentus*, the CTL was shown to be required for robust PG  
431 biosynthesis [17]. We therefore hypothesized that the altered PG composition observed during  
432 depletion of FtsZ<sub>AT</sub> could be due to absence of the CTL. To test this hypothesis, we introduced  
433 plasmids containing no FtsZ (empty vector control, pEmpty), full-length FtsZ<sub>AT</sub> (pFtsZ<sub>AT</sub>), or  
434 FtsZ<sub>AT</sub>ΔCTL (pFtsZ<sub>AT</sub>ΔCTL) into the *ftsZ* depletion strain. Each strain was grown under  
435 conditions in which expression of FtsZ<sub>AT</sub> from the chromosomal copy is depleted and expression  
436 of the FtsZ variant (if present) from the plasmid is induced. PG was isolated from these strains  
437 following induction/depletion and analyzed. Induction of full-length FtsZ<sub>AT</sub> from the plasmid  
438 yields lower levels of monomeric muropeptides compared to other strains, especially M3, and  
439 increased levels of dimeric and trimeric muropeptides, including D44 and T444 (Figure 7A-B).  
440 Overall the expression of full-length FtsZ<sub>AT</sub> leads to an increased level of muropeptides with DD-  
441 crosslinks (Figure 7C). These observations indicate that expression of plasmid-encoded full-  
442 length FtsZ<sub>AT</sub> compensates for the loss of FtsZ<sub>AT</sub> from the chromosome. In contrast, the  
443 expression of FtsZ<sub>AT</sub>ΔCTL did not compensate for the loss of full-length FtsZ as the PG  
444 composition is more similar to the PG profile of FtsZ-depleted cells (Figure 7A-C). This  
445 observation suggests that the CTL of FtsZ<sub>AT</sub> likely function in the regulation of proper PG  
446 biosynthesis at mid-cell.

447

448 **FtsZ CTL regulates protofilament assembly.** Work in *C. crescentus* has shown that the  
449 FtsZ<sub>CC</sub>CTL directly regulates protofilament structure and dynamics [53]. To determine if the  
450 CTL of FtsZ<sub>AT</sub> similarly regulates its assembly, we purified FtsZ<sub>AT</sub>ΔCTL and a control  
451 FtsZ<sub>AT</sub>+CTL protein containing the same restriction sites at the junctions with the GTPase  
452 domain and CTP as the ΔCTL construct, but with the CTL in place. FtsZ<sub>AT</sub>+CTL formed mostly

453 single, gently curved protofilaments when visualized by TEM under all conditions tested (Figure  
454 7D), similar to those observed for wildtype FtsZ<sub>AT</sub> (Figure 3C). In contrast, under high salt  
455 conditions we observed extended bundles of FtsZ<sub>AT</sub>ΔCTL (Figure 7D). Furthermore, we saw a  
456 decreased rate of GTP hydrolysis by FtsZ<sub>AT</sub>ΔCTL under conditions that promote bundling  
457 (Figure 7D;  $3.3 \pm 0.2$  GTP min<sup>-1</sup> FtsZ<sup>-1</sup> for FtsZ<sub>AT</sub>+CTL and  $2.1 \pm 0.1$  GTP min<sup>-1</sup> FtsZ<sup>-1</sup> for  
458 FtsZ<sub>AT</sub>ΔCTL with 300 mM KCl, n =3). Together, these results suggest an important role for the  
459 CTL in limiting lateral interactions between protofilaments and promoting polymer turnover.  
460 These results in *A. tumefaciens* are consistent with effects of the CTL on polymer bundling  
461 reported in *C. crescentus* [17, 53] and *E. coli* [59]. Moreover, in light of our observations that  
462 FtsZ<sub>AT</sub>ΔCTL does not restore proper PG chemistry to FtsZ<sub>AT</sub>-depleted cells (Figure 7A,B), these  
463 data are in line with the growing body of evidence linking FtsZ dynamics and polymer  
464 superstructure to the regulation of PG biosynthesis.

465

466 **FtsA is required for cell division but not termination of polar growth.** FtsA is an actin-like  
467 protein that associates with the membrane through an amphipathic helix and binds the FtsZ CTP  
468 to anchor FtsZ polymers to the membrane [51, 60]. In *C. crescentus*, recruitment of FtsA to mid-  
469 cell occurs well after the establishment of the FtsZ-ring and is dependent on the presence of FtsZ  
470 [13, 61]. In *A. tumefaciens*, FtsA-sfGFP is retained at the growth pole prior to appearing at mid-  
471 cell just before cell division [27, 30]. Here, we confirm that FtsA-sfGFP is observed as a focus at  
472 the growth pole until transitioning to a ring-like structure at mid-cell (Figure 8A, top panel). In  
473 fact, at some timepoints, both a polar focus and a mid-cell ring of FtsA are observed. Eventually,  
474 the polar focus disappears as the FtsA-sfGFP ring becomes more intense just prior to cell  
475 division. During the depletion of FtsZ<sub>AT</sub>, a focus of FtsA-sfGFP can be found at the growing

476 pole, and at a newly formed ectopic pole near mid-cell (Figure 8A, bottom panel). FtsA-sfGFP  
477 remains associated with each growth pole, and as the poles undergo tip splitting events, each  
478 focus of FtsA-sfGFP is also split, resulting in the presence of FtsA-sfGFP in each of the 4  
479 growth-active poles. These observations suggest that FtsZ<sub>AT</sub> is required not only for proper mid-  
480 cell localization of FtsA to mid-cell prior to cell division but also contributes to release of FtsA-  
481 sfGFP from the growth pole.

482 Since FtsA tethers FtsZ to the membrane and enables divisome assembly [37, 51, 52] in *E. coli*,  
483 we expected that the depletion of FtsA would phenocopy the depletion of FtsZ. Although a  
484 saturating transposon mutagenesis screen indicated that *ftsA* is not essential for *A. tumefaciens*  
485 cell survival [36], we were unable to construct a  $\Delta$ *ftsA* mutant. Thus, we constructed a depletion  
486 strain in which expression of *ftsA* is controlled by P<sub>lac</sub>. Under conditions where FtsA is present in  
487 the *ftsA* depletion strain, cells maintain proper rod-shaped morphology, polar growth, and cell  
488 division occurs from constrictions formed near mid-cell (Figure 8B-C, top panels). In contrast,  
489 when FtsA is depleted, cells exhibit a marked change in morphology (Figure 8B, bottom panel;  
490 Movie 2). During the depletion of FtsA, rod-shaped cells initially elongate from a growth pole  
491 (Figure 8B, bottom panel, 0 min). Polar growth is terminated and growth is re-initiated from near  
492 mid-cell, typically resulting in the formation of two ectopic poles perpendicular to the original  
493 longitudinal axis of the cell (Figure 8B, bottom panel, 170 min). Cells depleted of FtsA continue  
494 multipolar growth (Figure 8B, bottom panel, 360 min), terminate growth from both poles and  
495 reinitiate growth from near mid-cell resulting in the formation of a new pair of ectopic growth  
496 poles (Figure 8B, bottom panel, 510 min). This pattern of multipolar growth, polar growth  
497 termination, and new branch formation is continued until cells eventually bulge at the mid-cell  
498 and lyse. Overall these observations indicate that the phenotypes caused by FtsZ and FtsA

499 depletion are distinct from one another and suggest that only FtsZ is required for proper  
500 termination of polar growth.

501

502 To confirm that polar growth occurs and is terminated during FtsA depletion, cells were labeled  
503 with FDAAs (Figure 8C, bottom panel). Indeed, FDAAs label the tips of two poles, which are  
504 emerging from near mid-cell consistent with the re-initiation of polar growth. To further confirm  
505 that polar growth is terminated during FtsA depletion, we observed the localization of PopZ-YFP  
506 (Figure 8D, top panel). PopZ marks the growth poles [47] and becomes trapped at growth poles  
507 during depletion of FtsZ (Figure 4B). During FtsA depletion, PopZ-YFP is initially present at the  
508 growth pole (Figure 8D, top panel, 0 min). Next, PopZ-YFP disappears from the growth poles  
509 and reappears near mid-cell (Figure 8D, top panel, 80 min) indicating that polar growth is  
510 terminated. Throughout the FtsA depletion, PopZ-YFP continues to disappear from growth poles  
511 and reappears at the tips of newly emerging growth poles. Overall, these observations clearly  
512 indicate that FtsA is not necessary for termination of polar growth; however, FtsA has an  
513 essential function at a later stage of cell division since the cells fail to divide and are prone to  
514 lysis.

515

516 The ability of cells to target growth to near mid-cell during FtsA depletion suggests that FtsZ-  
517 rings may form, enabling the termination of polar growth. Indeed, FtsZ<sub>AT</sub>-sfGFP-rings form near  
518 mid-cell early during FtsA depletion (Figure 8D, bottom panel). FtsZ<sub>AT</sub>-sfGFP is briefly retained  
519 at new growth poles before reappearing to mark the site where a new growth pole will emerge.  
520 These observations are consistent with the finding the FtsA is retained at the growth pole longer



521 than FtsZ [27, 62], and suggest that FtsA arrives at mid-cell after Z-ring assembly and the  
522 initiation of FtsZ-dependent cell wall biogenesis. The results observed here in *A. tumefaciens* are  
523 consistent with the observation that FtsA arrives to mid-cell after FtsZ and the onset of mid-cell  
524 cell wall biogenesis in *C. crescentus* [13, 61]. In both *A. tumefaciens* and *C. crescentus*, the late  
525 arrival of FtsA to the divisome suggests that other proteins contribute to proper tethering of FtsZ  
526 to the membrane. In *C. crescentus*, the FtsZ-binding protein, FzlC, functions as a membrane  
527 anchor early during the establishment of the divisome [31, 63]. A homolog of FzlC is readily  
528 found in the *A. tumefaciens* genome (Atu2824) and may contribute to the ability of FtsZ-rings to  
529 form in the absence of FtsA.

530

### 531 **Depletion of the downstream divisome component FtsW phenocopies depletion of FtsA.**

532 Having observed a distinct effect on cell morphology in the absence of *ftsA*, we wondered if the  
533 phenotype observed during *ftsA* depletion could be recapitulated in the absence of another late-  
534 arriving divisome protein. To test this hypothesis, we constructed a depletion strain of FtsW,  
535 which is recruited to mid-cell after FtsA in both *E. coli* and *C. crescentus* divisome assembly  
536 models [11, 13]. Depletion of FtsW results in a phenotype which is strikingly similar to the  
537 depletion of FtsA (Figure 9). When FtsW is induced normal growth is observed (Figure 9A, top  
538 panel). During FtsW depletion, polar growth is terminated, resulting in the establishment of  
539 growth-active poles from near mid-cell (Figure 9A, bottom panel; Movie 3). Multiple rounds of  
540 termination of polar growth followed by reinitiation of growth from near mid-cell occur until the  
541 mid-cell bulges and the cells ultimately lyse (Figure 9A, bottom panel). Labeling of growth  
542 active poles with FDAAs (Figure 9B) or by tracking PopZ-YFP localization (Figure 9C, top  
543 panel) confirmed that new branches which emerge from mid-cell are formed by polar growth.

544 Finally, we confirmed that FtsZ-rings form during the depletion of FtsW and the presence of an  
545 FtsZ<sub>AT</sub>-sfGFP-ring typically marks the site where an ectopic growth pole will form (Figure 9C,  
546 bottom panel). Together, these observations suggest that FtsZ-rings are formed in the absence of  
547 FtsW, enabling the initiation of cell wall biogenesis. Given that FtsW drives septal PG  
548 biosynthesis, [64] these findings indicate that the cell wall biogenesis that occurs during  
549 depletion of FtsA or FtsW may require the elongation machinery, which typically functions in  
550 polar growth. Since the elongation machinery for *A. tumefaciens* remains to be identified, it is  
551 possible that there is considerable overlap between the machineries that contribute to polar and  
552 septal PG biosynthesis.

553

#### 554 **Concluding Remarks**

555 While many questions remain unanswered about the regulation of cell wall biogenesis in *A.*  
556 *tumefaciens*, our work sheds light on the transition from polar growth to mid-cell growth. We  
557 find that FtsZ<sub>AT</sub>, FtsA, and FtsW are required for constriction and cell separation, but FtsZ<sub>AT</sub> is  
558 also required to terminate polar growth and initiate mid-cell peptidoglycan synthesis. How might  
559 the formation of an FtsZ<sub>AT</sub>-ring at mid-cell cause the termination of polar growth? We find that  
560 PopZ, and LDTP<sub>0845</sub> become trapped at the growth poles during FtsZ depletion (Figure 5). It is  
561 possible that one or more of these proteins contributes to both polar peptidoglycan biosynthesis  
562 and mid-cell peptidoglycan synthesis and that the FtsZ-dependent targeting of these proteins (and  
563 likely others) to mid-cell triggers the termination of polar growth. While the mid-cell localization  
564 of PopZ is dependent on the presence of FtsZ<sub>AT</sub> (Figure 4), FtsZ<sub>AT</sub>-ring stability and placement  
565 are impacted by the absence of PopZ [45]. Furthermore, deletion of *popZ* impairs termination of  
566 polar growth and results in cell division defects [45, 46, 65]. The apparent co-dependence of  
567 FtsZ and PopZ for localization may suggest that these proteins function together during the early

568 stages of cell division, particularly the termination of polar growth and onset of mid-cell PG  
569 biosynthesis.

570

571 Overall, our results are consistent with a general model, which is highly conserved in bacteria, in  
572 which the establishment of a FtsZ-ring leads to the recruitment of many other cell division  
573 proteins to mid-cell [11], though many mechanistic questions remain. How is FtsZ<sub>AT</sub> targeted to  
574 mid-cell? A variety of mechanisms that contribute to the proper placement of FtsZ at mid-cell  
575 have been described (for review see [66, 67]). The most well studied mechanisms of FtsZ  
576 positioning include negative regulation by the Min system and nucleoid occlusion. While genes  
577 encoding components of the Min system are readily identifiable in the *A. tumefaciens* genome,  
578 the deletion of *minCDE* has a minimal impact on placement of constriction sites and cell division  
579 efficiency [68]. Furthermore, FtsZ<sub>AT</sub>-GFP rings form over DNA prior to nucleoid separation in  
580 *A. tumefaciens*. These observations indicate that additional regulatory mechanisms must  
581 contribute to proper division site selection in *A. tumefaciens*. Following the appearance of FtsZ at  
582 mid-cell, how is the FtsZ<sub>AT</sub>-ring stabilized? In *E. coli*, the FtsZ-ring is stabilized by interactions  
583 with FtsA and ZipA, which tether FtsZ filaments to the membrane [51, 52, 69, 70]. In *A.*  
584 *tumefaciens*, FtsZ<sub>AT</sub> appears at mid-cell well before FtsA [30] and we observe that FtsZ<sub>AT</sub> rings  
585 form even when FtsA is depleted (Figure 7C, bottom panel). Furthermore, the position of  
586 FtsZ<sub>AT</sub>-GFP rings marks the site of ectopic pole formation. These observations suggest the  
587 FtsZ<sub>AT</sub> is stabilized, at least early during cell division by other proteins. While there are no  
588 obvious ZipA homologs encoded in the *A. tumefaciens* genome, a homolog of FzlC, which  
589 functions to stabilize FtsZ in *C. crescentus* [31, 63], is encoded in the genome.

590

591 The observation that FtsZ is necessary for the initiation of mid-cell PG biosynthesis suggests that  
592 FtsZ is necessary for recruitment of PG biosynthesis enzymes to mid-cell. Septal PG  
593 biosynthesis is likely mediated by FtsW, a putative PG glycosyltransferase [71-73], and PBP3  
594 (FtsI), a PG DD-transpeptidase [74]. In *A. tumefaciens*, depletion of FtsW does not cause a  
595 complete block of PG synthesis at mid-cell (Figure 8). This observation suggests that mid-cell  
596 PG biosynthesis is mediated by other cell wall biogenesis enzymes while the activity of FtsW  
597 contributes to later stages of cell division, consistent with the inability of cells to form  
598 constrictions and separate in the absence of FtsW. These observations may indicate that the  
599 initial PG biosynthesis at mid-cell comprises the final stage of cell elongation, consistent with  
600 descriptions of FtsZ-dependent mid-cell elongation in *C. crescentus* [16]. The observation that  
601 growth-active, ectopic poles emerge from near mid-cell during FtsW depletion (Figure 8B)  
602 provides evidence in support of this possibility. Thus, FtsZ-dependent PG biosynthesis may  
603 contribute to both elongation and cell division in *A. tumefaciens*. For a polar growing bacterium,  
604 it is tempting to speculate that the retention of PG biosynthesis machinery dedicated to  
605 elongation at the site of cell division may prime the newly formed poles to become growth active  
606 following cell separation.

607

## 608 **Materials and Methods**

609 **Bacterial strains and culture conditions.** All bacterial strains and plasmids used are listed in  
610 Table S4.1. *A. tumefaciens* strains were grown in ATGN minimal medium with .5% glucose [75]  
611 at 28°C. *E. coli* strains were grown in Luria-Bertani medium at 37°C. When indicated,  
612 kanamycin (KM) was used at 300 µg/ml for *A. tumefaciens*, 50 µg/ml for *E. coli* DH5α, and 25  
613 µg/ml for *E. coli* S17-1 λ *pir*. Gentamicin was used when indicated at 200 µg/ml for *A.*

614 *tumefaciens* and 20 µg/ml for *E. coli* DH5α. IPTG was added at a concentration of 1 mM when  
615 indicated. Cumate was added at a concentration of 0.1 mM when indicated.

616

617 **Construction of expression plasmids and strains.** All strains and plasmids used are listed in  
618 Table S4.1, while primers used are listed in Table S4.2. For amplification of target genes, primer  
619 names indicate the primer orientation and added restriction sites. To construct expression vectors  
620 containing *ftsZ<sub>AT</sub>-sfgfp*, *ftsZ<sub>1</sub>-sfgfp*, *ftsZ<sub>3</sub>-sfgfp*, and *ldtp<sub>0845</sub>-sfgfp* the respective coding sequence  
621 was amplified from purified C58 genomic DNA using primers indicated in Table S4.2. The  
622 amplicons were digested overnight and ligated into cut pSRKKM-P<sub>lac</sub>-*sfgfp* using NEB T4 DNA  
623 ligase at 4°C overnight. The newly formed *sfgfp* fusion of each gene was excised from the  
624 plasmid by overnight digestion with NdeI and NheI. Fragments containing *ftsZ<sub>AT</sub>-sfgfp*, *ftsZ<sub>1</sub>-*  
625 *sfgfp*, *ftsZ<sub>3</sub>-sfgfp*, and *ldtp<sub>0845</sub>-sfgfp* were then ligated into cut pRV-MCS2 to give constitutive  
626 expression vectors containing the fusions. To construct the *popZ-yfp* expression vector, *popZ*  
627 along with the upstream promoter sequence were amplified from purified C58 genomic DNA,  
628 digested and ligated into pMR10.

629

630 To construct pSRKKM-P<sub>cym</sub>, a synthesized gBlock from IDT Integrated DNA Technologies was  
631 made containing the regulatory elements of the cumate system similar to previously described  
632 plasmid constructs [76, 77]. The P<sub>cym</sub> promoter region is annotated in Table S4.2. The sequence  
633 encoding the cumate repressor was codon optimized for *A. tumefaciens* and placed under the  
634 control of the constitutive kanamycin promoter from pSRKKM-P<sub>lac</sub>-*sfgfp*. The synthesized  
635 gBlock was digested overnight with EcoRI and NdeI. The resulting fragment was then ligated

636 into cut pSRKKm-P<sub>lac</sub>-*sfgfp* thereby replacing the original *lac* promoter and repressor with the  
637 cumate repressor and cumate regulated promoter.

638

639 Next, *yfp-parB* was excised from pSRKKM-P<sub>lac</sub>-*yfp-parB* [46] and ligated into pSRKKM-P<sub>cym</sub> to  
640 create an expression vector compatible with the depletion strains. To create expression vectors  
641 for *ftsZ<sub>AT</sub>*, *ftsZ<sub>AT</sub>ΔCTP*, and *ftsZ<sub>AT</sub>ΔCTL* the respective target gene was amplified utilizing  
642 indicated primers, digested overnight with NdeI and BamHI and ligated into pSRKKM-P<sub>cym</sub>.

643 All expression vectors were verified by sequencing. All vectors were introduced into *A.*  
644 *tumefaciens* strains utilizing standard electroporation protocols [78] with the addition of IPTG in  
645 the media when introducing plasmids into in depletion backgrounds.

646

647 **Construction of deletion/depletion plasmids and strains.** Vectors for gene deletion by allelic  
648 exchange were constructed using recommended methods for *A. tumefaciens* [78]. Briefly, 500 bp  
649 fragments upstream and downstream of the target gene were amplified using primer pairs P1/P2  
650 and P3/P4 respectively. Amplicons were spliced together by SOEing using primer pair P1/P4.  
651 The amplicon was digested and ligated into pNTPS139. The deletion plasmids were introduced  
652 into *A. tumefaciens* by mating using an *E. coli* S17 conjugation strain to create KM resistant,  
653 sucrose sensitive primary exconjugants. Primary exconjugants were grown overnight in media  
654 with no selection. Secondary recombinants were screened by patching for sucrose resistance and  
655 KM sensitivity. Colony PCR with primers P5/P6 for the respective gene target was used to  
656 confirm deletion. PCR products from P5/P6 primer sets were sequenced to further confirm  
657 deletions.

658 For depletion strains, target genes (*ftsZ<sub>AT</sub>*, *ftsA*, and *ftsW*) were amplified, digested and ligated  
659 into either pUC18-mini-Tn7T-GM-P<sub>lac</sub> or pUC18-mini-Tn7T-GM-P<sub>lac</sub>. The mini-Tn7 vectors,  
660 along with the pTNS3 helper plasmid, were introduced into C58Δ*tetRA*::a-*att*Tn7 as described  
661 previously [32]. Transformants were selected for gentamicin resistance and insertion of the target  
662 gene into the a-*att* site was verified by colony PCR using the tet forward and Tn7R109 primer.  
663 PCR products were sequenced to confirm insertion of the correct gene. Next, the target gene was  
664 deleted from the native locus as described above in the presence of 1 mM IPTG to drive  
665 expression of the target gene from the engineered site.

666

667 **Construction of plasmids for protein expression and purification.** To construct pET21a  
668 FtsZ<sub>AT</sub>, *ftsZ<sub>AT</sub>* was amplified from C58 genomic DNA with FtsZ<sub>AT</sub> For NdeI and FtsZ<sub>AT</sub> Rev  
669 EcoRI, digested with NdeI and EcoRI, and ligated into similarly digested pET21a. To construct  
670 pTB146 FtsZ<sub>I</sub>, *ftsZ<sub>I</sub>* was amplified from C58 genomic DNA with FtsZ<sub>I</sub> For SapI and FtsZ<sub>I</sub> Rev  
671 BamHI, digested with SapI and BamHI, and ligated into similarly digested pTB146. Ligation  
672 products were transformed into NEB Turbo (New England Biolabs) and selected for ampicillin  
673 resistance. Insertions were verified by colony PCR and Sanger sequencing. Primers FtsZ<sub>AT</sub>-  
674 L72W and FtsZ<sub>I</sub>-L71W were used to mutagenize pET21a FtsZ<sub>AT</sub> and pTB146 FtsZ<sub>I</sub>,  
675 respectively, using the Quikchange Multi Lightning Mutagenesis Kit (Agilent) and following the  
676 manufacturer's protocol to generate pET21a FtsZ<sub>AT</sub>-L72W and pTB146 FtsZ<sub>I</sub>-L71W. Mutations  
677 in the targeted sites were verified by Sanger sequencing.

678 pET21c FtsZ<sub>AT</sub>+CTL and pET21c FtsZ<sub>AT</sub>ΔCTL were constructed in several steps. First, the  
679 GTPase domain of *ftsZ<sub>AT</sub>* was amplified from C58 genomic DNA using FtsZ<sub>AT</sub> For NdeI and  
680 FtsZ<sub>AT</sub> GTPase Rev KpnI SacI, split into two aliquots, and digested with NdeI and KpnI or NdeI

681 and SacI. The CTL region of *ftsZ<sub>AT</sub>* was amplified from C58 genomic DNA using FtsZ<sub>AT</sub> CTL  
682 For KpnI and FtsZ<sub>AT</sub> CTL Rev SacI and digested with KpnI and SacI. For FtsZ<sub>AT</sub>+CTL, the  
683 GTPase domain amplicon (digested with NdeI and KpnI) was combined with the CTL amplicon  
684 (digested with KpnI and SacI) and together they were ligated into pXCFPN-1 [79] digested with  
685 NdeI and SacI. For FtsZ<sub>AT</sub>ΔCTL, the GTPase domain amplicon (digested with NdeI and SacI)  
686 was ligated into pXCFPN-1 digested with NdeI and SacI. Each was transformed into NEB  
687 Turbo, selected for spectinomycin resistance, and confirmed by colony PCR and Sanger  
688 sequencing. Next, the CTP was added to each of the above constructs by annealing oligos FtsZ<sub>AT</sub>  
689 CTP + and FtsZ<sub>AT</sub> CTP – (engineered with overhangs compatible with SacI and NheI ligation)  
690 and ligating into the above constructs digested with SacI and NheI. Each was transformed into  
691 NEB Turbo and confirmed as above to generate pX1 FtsZ<sub>AT</sub>+CTL and pX1 FtsZ<sub>AT</sub>ΔCTL.  
692 Finally, FtsZ<sub>AT</sub>+CTL and FtsZ<sub>AT</sub>ΔCTL were subcloned into pET21c by digestion of pX1  
693 FtsZ<sub>AT</sub>+CTL and pX1 FtsZ<sub>AT</sub>ΔCTL with NdeI and NheI and ligating into similarly digested  
694 pET21c. Each was transformed into NEB Turbo, selected for ampicillin resistance, and  
695 confirmed by colony PCR and Sanger sequencing.

696

697 **DIC and phase contrast microscopy.** Exponentially growing cells (OD<sub>600</sub> = ~0.6) were spotted  
698 on 1% agarose ATGN pads as previously described [80]. Microscopy was performed with an  
699 inverted Nikon Eclipse TiE with a QImaging Rolera em-c<sup>2</sup> 1K EMCCD camera and Nikon  
700 Elements Imaging Software. For time-lapse microscopy, images were collected every ten  
701 minutes, unless otherwise stated.

702



703 **Fluorescence microscopy.** Plasmid encoded FtsZ<sub>AT</sub>-sfGFP, FtsZ<sub>1</sub>-sfGFP, FtsZ<sub>3</sub>-sfGFP, and  
704 LDTP<sub>0845</sub>-sfGFP fusions were expressed from the P<sub>van</sub> promoter, which provides constitutive low  
705 levels of expression (Figure 6- Figure Supplement 1C). Plasmid encoded FtsA-sfGFP and PopZ-  
706 YFP fusions were expressed from the native promoters. Expression of plasmid encoded YFP-  
707 ParB was induced by the presence of 0.1 mM cumate for 2 hours (h). Cells containing plasmids  
708 with fluorescent protein fusions were grown to exponential phase before imaging on agarose  
709 pads.

710 To visualize DNA, 1 ml of exponentially growing cells was treated with 1 µl of Sytox Orange  
711 for 5 minutes. Cells were collected by centrifugation and washed with PBS 2 times followed by a  
712 final resuspension in PBS. Cells were then imaged on agarose pads.

713 To visualize sites of active peptidoglycan synthesis 1 ml of exponentially growing cells was  
714 labeled with the fluorescent D-amino acid (FDAA), HCC amino-D-alanine (HADA), as  
715 previously described [49, 80].

716

717 **Cell viability and growth curve assays.** For cell viability spot assays, exponentially growing  
718 cultures were diluted to OD<sub>600</sub> = 0.1 and serially diluted in ATGN. 3 µl of each dilution was  
719 spotted onto ATGN and incubated at 28°C for 3 days before imaging. When appropriate ATGN  
720 plates contained KM 300 µg/ml, IPTG 1mM, and cumate 0.1 mM as indicated in figure legends.  
721 For growth curve analysis, exponentially growing cultures were diluted to OD<sub>600</sub> = .05 in 200 µl  
722 of ATGN in 96-well plates. Plates were shaken for 1 minute before OD<sub>600</sub> readings, which were  
723 taken every 10 minutes.

724

725 **Cell morphology and constriction rate analysis.** Exponentially growing cells were imaged  
726 using phase contrast microscopy as described above. Cell length, area, and constrictions were  
727 detected using MicrobeJ software [81].

728 To calculate constriction rates, cells with detectable constrictions were tracked using time-lapse  
729 microscopy. The width of the cell constriction was measured at an initial time-point and the  
730 measurement was repeated after 10 minutes. The difference in constriction width was divided by  
731 the 10-minute time interval to give a constriction rate.

732

733 **Western blot analysis.** For western blot analysis of FtsZ depletion, the *ftsZ* depletion strain was  
734 grown in 40 ml ATGN with 1 mM IPTG to exponential phase. 2 ml of culture was collected  
735 prior to depletion (time 0) by centrifugation at 10,000 x g for 3 minutes. The remaining culture  
736 was collected by centrifugation at 3500 x g for 10 minutes, and supernatants were discarded.  
737 Cells were washed in sterile water and pelleted again. To deplete FtsZ, the pellet was  
738 resuspended in fresh ATGN without IPTG and grown under standard culturing conditions. 2-ml  
739 samples were collected by centrifugation after 30, 45, 60, 120, and 240 minutes of depletion.  
740 OD<sub>600</sub> was taken for each sample prior to centrifugation so that samples could be normalized to  
741 an OD<sub>600</sub> equivalent to 0.68. The cell pellets were incubated with 100 µl of a master mix  
742 containing 1 ml of BugBuster protein extraction reagent (Novagen) and supplemented with 1  
743 EDTA-free protease inhibitor cocktail (Sigma), 10 µl of lysonase (Novagen), 2,500 U/ml DNase  
744 I (Thermo Scientific), and 1 mM dithiothreitol (DTT) (Thermo Scientific) for 25 minutes with  
745 shaking at room temperature to lyse the cell pellets. The whole-cell lysates were clarified by  
746 centrifugation at 10,000 rpm for 15 min. A final concentration of 1 X Laemmli buffer was added  
747 to the cleared cell lysates. Samples were boiled at 100°C for 5 min prior to loading on a 4-15%

748 Mini-PROTEAN TGX Precast Gel (Bio-Rad). The separated proteins were electroblotted onto  
749 polyvinylidene difluoride (PVDF) membranes (Bio-Rad) and blocked overnight in 5% nonfat  
750 dry milk powder solubilized in 1% TBST (Tris-buffered saline [TBS], 1% Tween 20). The  
751 blocked PVDF membranes were probed with *Escherichia coli* anti-FtsZ (1:3000) monoclonal  
752 antibody (gift from Joe Lutkenhaus) for 1.5 h in 5% milk-TBST, followed by incubation with  
753 anti-rabbit (1:5000) HRP (Pierce 31460) secondary antibody for 1 h in 5% milk-TBST. The  
754 secondary antibody was detected using the ECL Plus HRP substrate (Thermo Scientific Pierce).

755

756 For comparison of expression from  $P_{van}$ ,  $P_{lac}$ , and  $P_{cym}$  promoters, strains were grown in 2 ml  
757 ATGN with 200 ug/mL KM to exponential phase.  $P_{lac}$  and  $P_{cym}$  were induced with 1 mM IPTG  
758 and 50  $\mu$ M cumate, respectively for 4 h. Cell pellets were lysed as described above and clarified  
759 whole-cell lysates were boiled with 1 X Laemmli buffer for 5 min prior to loading on 4-15%  
760 Mini-PROTEAN TGX Precast Gel (Bio-Rad). The separated proteins were electroblotted onto  
761 PVDF membranes (Bio-Rad), blocked as described above, and probed with anti-GFP (1:3,000)  
762 monoclonal antibody (Thermo Scientific Pierce) for 1 h in 5% milk-TBST, followed by  
763 incubation with a donkey anti-mouse (1:300) horseradish peroxidase-conjugated secondary  
764 antibody (Thermo Scientific Pierce) for 1 h in 5% milk-TBST. The secondary antibody was  
765 detected using the ECL Plus HRP substrate (Thermo Scientific Pierce).

766

767 **Protein expression and purification.** FtsZ<sub>AT</sub>, FtsZ<sub>AT</sub>-L72W, FtsZ<sub>AT</sub>+CTL (FtsZ<sub>AT</sub> with  
768 restriction sites flanking the CTL), and FtsZ<sub>AT</sub> $\Delta$ CTL (FtsZ<sub>AT</sub> with the CTL deleted, containing  
769 the same restriction sites at the GTPase-CTC junction as in FtsZ<sub>AT</sub>+CTL) were expressed and  
770 purified in untagged form. Each was produced from a pET21 expression vector (pEG1555 –

771 FtsZ<sub>AT</sub>, pEG1556 - FtsZ<sub>AT</sub>-L72W, pEG1444 - FtsZ<sub>AT</sub>+CTL, pEG1445 - FtsZ<sub>AT</sub>ΔCTL) in  
772 *Escherichia coli* Rosetta(DE3)pLysS induced at 37°C for 4 h with 0.5 mM IPTG after OD  
773 reached 0.8 to 1.0 OD at 600 nm. Cells were harvested by centrifugation at 6000 x g and  
774 resuspended in 30 mL FtsZ QA buffer (50 mM Tris-HCl pH 8, 50 mM KCl, 0.1 mM EDTA,  
775 10% glycerol) per liter of culture. Resuspensions were snap frozen in liquid nitrogen and stored  
776 at -80°C until purification. To purify, resuspensions were thawed quickly and cells were lysed by  
777 incubation with 1 mg/mL lysozyme, 2.5 mM MgCl<sub>2</sub>, DNase I, 2 mM PMSF, and a cComplete  
778 mini EDTA-free protease inhibitor tablet (Roche) for 45 min to 1 h at room temperature  
779 followed by sonication. Lysates were cleared by centrifugation at 15000 x g for 30 min at 4°C  
780 and filtered through a 0.45 μm filter before anion exchange chromatography (HiTrap Q HP 5  
781 mL, GE Life Sciences). Protein was eluted with a linear KCl gradient (FtsZ QA buffer with 50 to  
782 500 mM KCl) and fractions containing FtsZ were verified by SDS-PAGE, pooled, and subjected  
783 to ammonium sulfate precipitation. Precipitates (at 17-20% ammonium sulfate saturation  
784 depending on the variant) were verified by SDS-PAGE, resuspended in HEK50G (50 mM  
785 HEPES-KOH pH 7.2, 0.1 mM EDTA, 50 mM KCL, 10% glycerol, 1 mM β-mercaptoethanol),  
786 and further purified by gel filtration (Superdex 200 10/300 GL, GE Life Sciences). Peak  
787 fractions were pooled, snap frozen in liquid nitrogen, and stored at -80°C.

788

789 FtsZ<sub>1</sub> and FtsZ<sub>1</sub>-L71W were produced as His<sub>6</sub>-SUMO fusions and cleaved to yield untagged,  
790 scarless proteins. Each was produced from a pTB146 expression vector (pEG1535 - FtsZ<sub>1</sub>,  
791 pEG1542 - FtsZ<sub>1</sub>-L71W) in *E. coli* Rosetta (DE3)pLysS as described above. Cells were  
792 harvested by centrifugation as above, resuspended in HK300G (50 mM HEPES-KOH pH7.2,  
793 300 mM KCl, 10% glycerol) with 20 mM imidazole, snap frozen in liquid nitrogen, and stored at

794 -80°C until purification. To purify, resuspensions were thawed quickly and cells were lysed by  
795 incubation with 1 mg/mL lysozyme, 2.5 mM MgCl<sub>2</sub>, and DNase I for 45 min at room  
796 temperature followed by sonication. Lysate was cleared and filtered as described above. Protein  
797 was isolated by Ni<sup>2+</sup> affinity chromatography (HisTrap FF 1 mL, GE Life Sciences) and eluted in  
798 HK300G with 300 mM imidazole. Fractions containing His<sub>6</sub>-SUMO fusions were verified by  
799 SDS-PAGE, combined with Ulp1 Sumo protease at a 1:100 (protease:FtsZ) molar ratio, and  
800 cleaved by incubation at 30°C for 3.5 h. Cleaved FtsZ<sub>1</sub> or FtsZ<sub>1</sub>L71W was purified away from  
801 His<sub>6</sub>-SUMO by gel filtration (Superdex 200 10/300 GL, GE Life Sciences) in HEK50G. Peak  
802 fractions were pooled, snap frozen in liquid nitrogen, and stored at -80°C.

803

804 **Polymerization kinetics assays.** A Fluoromax-3 spectrofluorometer (Jobin Yvon, Inc) was used  
805 to monitor FtsZ polymerization by right-angle light scattering and tryptophan fluorescence. FtsZ<sub>1</sub>  
806 and/or FtsZ<sub>AT</sub> (wild-type or L71W/L72W mutants, as indicated in figures and text) was  
807 polymerized in HEK50 (50 mM HEPES-KOH pH 7.2, 50 mM KCl, 0.1 mM EDTA) with 2.5  
808 mM MgCl<sub>2</sub>. 2 mM GTP was used to induce polymerization for light scattering and 50 μM GTP  
809 was used to induce polymerization for tryptophan fluorescence (GTP is fluorescent at the  
810 wavelengths used, so low concentrations must be used). GTP was added after baseline light  
811 scatter or fluorescence was established. For light scattering, samples were excited at 350 nm and  
812 scatter was detected at 350 nm with slits set to 2 nm. For tryptophan fluorescence, samples were  
813 excited at 295 nm and emission was detected at 344 nm, with 2 nm slits.

814

815 **GTPase assay.** FtsZ<sub>1</sub> and/or FtsZ<sub>AT</sub> was polymerized in HEK50 with 2.5 mM MgCl<sub>2</sub> and 2 mM  
816 GTP. FtsZ<sub>AT</sub>+CTL or FtsZ<sub>AT</sub>ΔCTL was polymerized in HEK50 or HEK300 (same as HEK50 but  
817 with 300 mM KCl) as indicated, with 10 mM MgCl<sub>2</sub> and 2 mM GTP. GTP was added at time 0.  
818 Reaction was stopped at 5, 10, 15, 20, and 30 minutes with quench buffer (50 mM HEPES-KOH  
819 pH 7.2, 21.3 mM EDTA, 50 mM KCl). Inorganic phosphate in solution (liberated by GTP  
820 hydrolysis) over time was measured using SensoLyte MG Phosphate Assay Kit Colorimetric  
821 (AnaSpec, Inc, Fremont, California).

822  
823 **Negative stain transmission electron microscopy (TEM).** FtsZ<sub>1</sub> and/or FtsZ<sub>AT</sub> were  
824 polymerized in HEK50 with 2.5 mM MgCl<sub>2</sub> and 2 mM GTP. 4 μM FtsZ<sub>AT</sub>+CTL or FtsZ<sub>AT</sub>ΔCTL  
825 were polymerized in HEK50 or HEK300 as indicated with 10 mM MgCl<sub>2</sub> and 2 mM GTP. After  
826 a 15-minute incubation at room temperature, samples were applied to carbon-coated glow-  
827 discharged grids with 0.75% uranyl formate staining as previously described [17, 82]. TEM  
828 samples were imaged using a Philips/FEI BioTwin CM120 TEM equipped with an AMT XR80 8  
829 megapixel CCD camera (AMT Imaging, USA).

830  
831 **Peptidoglycan composition analysis**

832 Six cultures of WT and *ftsZ* depletion cells were grown in 10 ml of ATGN with IPTG to  
833 exponential phase. The 10 ml cell cultures were added to 40 ml of fresh media. The 50 ml cultures  
834 were grown to exponential phase and pelleted by centrifugation at 4000 x g for 10 minutes. Cell  
835 pellets were washed three times with ATGN by centrifugation and resuspension to remove IPTG.  
836 After the final wash 3 cell pellets were resuspended in 50 ml ATGN and the remaining 3 pellets

837 were resuspended in 50 ml ATGN with 1 mM IPTG. Each culture was grown for 14 h. The optical  
838 densities of the cells were monitored to ensure the optical density of the cultures never went above  
839  $OD_{600} = 0.7$  to avoid changes to peptidoglycan content due to stationary phase. If necessary, fresh  
840 medium was added to dilute the cultures to maintain exponential growth. After 14 h of growth, 50  
841 ml of the exponential cultures were collected and pelleted by centrifugation at  $4000 \times g$  for 20  
842 minutes. Cell pellets were resuspended in 1 mL of ATGN and 2 mL of 6% SDS and stirred with  
843 magnets while boiling for 4 h. After 4 h, samples were removed from heat but continued to stir  
844 overnight. Samples were then shipped to Dr. Felipe Cava's laboratory for purification and analysis.  
845  
846 Upon arrival, cells were boiled and simultaneously stirred by magnets for 2 h. After 2 h, boiling  
847 was stopped and samples were stirred overnight. Peptidoglycan was pelleted by centrifugation for  
848 13 min at 60000 rpm (TLA100.3 Beckman rotor, Optima Max-TL ultracentrifuge; Beckman), and  
849 the pellets were washed 3 to 4 times by repeated cycles of centrifugation and resuspension in water.  
850 The pellet from the final wash was resuspended in 50  $\mu$ l of 50 mM sodium phosphate buffer, pH  
851 4.9, and digested overnight with 100  $\mu$ g/ml of muramidase at 37°C. Muramidase digestion was  
852 stopped by boiling for 4 min. Coagulated protein was removed by centrifugation for 15 min at  
853 15000 rpm in a desktop microcentrifuge. The muropeptides were mixed with 15  $\mu$ l 0.5 M sodium  
854 borate and subjected to reduction of muramic acid residues into muramitol by sodium borohydride  
855 (10 mg/ml final concentration, 20 min at room temperature) treatment. Samples were adjusted to  
856 pH 3 to 4 with orthophosphoric acid and filtered (0.2- $\mu$ m filters).

857  
858 Muropeptides were analyzed on a Waters UPLC system equipped with an ACQUITY UPLC BEH  
859 C18 Column, 130 Å, 1.7  $\mu$ m, 2.1 mm  $\times$  150 mm (Waters) and a dual wavelength absorbance

860 detector. Elution of muropeptides was detected at 204 nm. Muropeptides were separated at 45°C  
861 using a linear gradient from buffer A [formic acid 0.1% (v/v)] to buffer B [formic acid 0.1% (v/v),  
862 acetonitrile 20% (v/v)] in a 12 min run with a 0.250 ml/min flow. Peptidoglycan compositional  
863 analysis on triplicate samples was completed on two separate occasions.

864

## 865 **ACKNOWLEDGEMENTS**

866 We thank members of the Brown lab for helpful discussions and critical reading of this  
867 manuscript.

868

## 869 **FUNDING INFORMATION**

870 PB and MH were supported by the National Science Foundation, IOS1557806. This work was  
871 funded in part by the National Institutes of Health through R01GM108640 (EDG) and  
872 T32GM007445 (training support of PJJ). FC and AA receive funding support from Laboratory  
873 for Molecular Infection Medicine Sweden, Knut and Alice Wallenberg Foundation, Kempe and  
874 the Swedish Research Council. AA is supported by a MIMS/VR PhD position.

875



## 876 **References**

- 877 1. den Blaauwen T, Andreu JM, Monasterio O. Bacterial cell division proteins as antibiotic  
878 targets. *Bioorg Chem.* 2014;55:27-38. Epub 2014/04/24. doi: 10.1016/j.bioorg.2014.03.007.  
879 PMID: 24755375.
- 880 2. Haeusser DP, Levin PA. The great divide: coordinating cell cycle events during bacterial  
881 growth and division. *Curr Opin Microbiol.* 2008;11(2):94-9. Epub 2008/04/09. doi:  
882 10.1016/j.mib.2008.02.008. PMID: 18396093.
- 883 3. Wu LJ, Errington J. Coordination of cell division and chromosome segregation by a  
884 nucleoid occlusion protein in *Bacillus subtilis*. *Cell.* 2004;117(7):915-25. Epub 2004/06/24. doi:  
885 10.1016/j.cell.2004.06.002. PMID: 15210112.
- 886 4. Bi EF, Lutkenhaus J. FtsZ ring structure associated with division in *Escherichia coli*.  
887 *Nature.* 1991;354(6349):161-4. Epub 1991/11/14. doi: 10.1038/354161a0. PMID: 1944597.
- 888 5. de Boer P, Crossley R, Rothfield L. The essential bacterial cell-division protein FtsZ is a  
889 GTPase. *Nature.* 1992;359(6392):254-6. Epub 1992/09/17. doi: 10.1038/359254a0. PMID:  
890 1528268.
- 891 6. Li Z, Trimble MJ, Brun YV, Jensen GJ. The structure of FtsZ filaments in vivo suggests  
892 a force-generating role in cell division. *Embo j.* 2007;26(22):4694-708. Epub 2007/10/20. doi:  
893 10.1038/sj.emboj.7601895. PMID: 17948052.
- 894 7. Fu G, Huang T, Buss J, Coltharp C, Hensel Z, Xiao J. In vivo structure of the *E. coli*  
895 FtsZ-ring revealed by photoactivated localization microscopy (PALM). *PLoS One.*  
896 2010;5(9):e12682. Epub 2010/09/22. doi: 10.1371/journal.pone.0012680. PMID: 20856929.
- 897 8. Holden SJ, Pengo T, Meibom KL, Fernandez Fernandez C, Collier J, Manley S. High  
898 throughput 3D super-resolution microscopy reveals *Caulobacter crescentus* in vivo Z-ring

- 899 organization. Proc Natl Acad Sci U S A. 2014;111(12):4566-71. Epub 2014/03/13. doi:  
900 10.1073/pnas.1313368111. PMID: 24616530.
- 901 9. Bisson-Filho AW, Hsu YP, Squyres GR, Kuru E, Wu F, Jukes C, et al. Treadmilling by  
902 FtsZ filaments drives peptidoglycan synthesis and bacterial cell division. Science.  
903 2017;355(6326):739-43. Epub 2017/02/18. doi: 10.1126/science.aak9973. PMID: 28209898.
- 904 10. Yang X, Lyu Z, Miguel A, McQuillen R, Huang KC, Xiao J. GTPase activity-coupled  
905 treadmilling of the bacterial tubulin FtsZ organizes septal cell wall synthesis. Science.  
906 2017;355(6326):744-7. Epub 2017/02/18. doi: 10.1126/science.aak9995. PMID: 28209899.
- 907 11. Du S, Lutkenhaus J. Assembly and activation of the *Escherichia coli* divisome. Mol  
908 Microbiol. 2017;105(2):177-87. doi: doi:10.1111/mmi.13696.
- 909 12. Meier EL, Goley ED. Form and function of the bacterial cytokinetic ring. Curr Opin Cell  
910 Biol. 2014;26:19-27. Epub 2014/02/18. doi: 10.1016/j.ceb.2013.08.006. PMID: 24529242.
- 911 13. Goley ED, Yeh YC, Hong SH, Fero MJ, Abeliuk E, McAdams HH, et al. Assembly of  
912 the *Caulobacter* cell division machine. Mol Microbiol. 2011;80(6):1680-98. Epub 2011/05/06.  
913 doi: 10.1111/j.1365-2958.2011.07677.x. PMID: 21542856.
- 914 14. Erickson HP, Anderson DE, Osawa M. FtsZ in bacterial cytokinesis: cytoskeleton and  
915 force generator all in one. Microbiol Mol Biol Rev. 2010;74(4):504-28. Epub 2010/12/02. doi:  
916 10.1128/mubr.00021-10. PMID: 21119015.
- 917 15. Varma A, Young KD. FtsZ collaborates with penicillin binding proteins to generate  
918 bacterial cell shape in *Escherichia coli*. J Bacteriol. 2004;186(20):6768-74. Epub 2004/10/07.  
919 doi: 10.1128/jb.186.20.6768-6774.2004. PMID: 15466028.
- 920 16. Aaron M, Charbon G, Lam H, Schwarz H, Vollmer W, Jacobs-Wagner C. The tubulin  
921 homologue FtsZ contributes to cell elongation by guiding cell wall precursor synthesis in

- 922 *Caulobacter crescentus*. Mol Microbiol. 2007;64(4):938-52. Epub 2007/05/16. doi:  
923 10.1111/j.1365-2958.2007.05720.x. PMID: 17501919.
- 924 17. Sundararajan K, Miguel A, Desmarais SM, Meier EL, Huang KC, Goley ED. The  
925 bacterial tubulin FtsZ requires its intrinsically disordered linker to direct robust cell wall  
926 construction. Nat Commun. 2015;6:7281. doi: 10.1038/ncomms8281. PMID: 26099469.
- 927 18. Aarsman ME, Piette A, Fraipont C, Vinkenvleugel TM, Nguyen-Disteche M, den  
928 Blaauwen T. Maturation of the *Escherichia coli* divisome occurs in two steps. Mol Microbiol.  
929 2005;55(6):1631-45. Epub 2005/03/09. doi: 10.1111/j.1365-2958.2005.04502.x. PMID:  
930 15752189.
- 931 19. Gray AN, Egan AJ, Van't Veer IL, Verheul J, Colavin A, Koumoutsi A, et al.  
932 Coordination of peptidoglycan synthesis and outer membrane constriction during *Escherichia*  
933 *coli* cell division. Elife. 2015;4. Epub 2015/05/08. doi: 10.7554/eLife.07118. PMID: 25951518.
- 934 20. Pini F, De Nisco NJ, Ferri L, Penterman J, Fioravanti A, Brillì M, et al. Cell cycle control  
935 by the master regulator CtrA in *Sinorhizobium meliloti*. PLOS Genetics. 2015;11(5):e1005232.  
936 doi: 10.1371/journal.pgen.1005232.
- 937 21. Howell M, Brown PJB. Building the bacterial cell wall at the pole. Current Opinion in  
938 Microbiology. 2016;34:53-9. doi: 10.1016/j.mib.2016.07.021.
- 939 22. Pini F, Frage B, Ferri L, De Nisco NJ, Mohapatra SS, Taddei L, et al. The DivJ, CbrA  
940 and PleC system controls DivK phosphorylation and symbiosis in *Sinorhizobium meliloti*. Mol  
941 Microbiol. 2013;90(1):54-71. Epub 2013/08/06. doi: 10.1111/mmi.12347. PMID: 23909720.
- 942 23. Bellefontaine AF, Pierreux CE, Mertens P, Vandenhaute J, Letesson JJ, De Bolle X.  
943 Plasticity of a transcriptional regulation network among alpha-proteobacteria is supported by the

- 944 identification of CtrA targets in *Brucella abortus*. Mol Microbiol. 2002;43(4):945-60. Epub  
945 2002/04/04. PMID: 11929544.
- 946 24. Cheng J, Sibley CD, Zaheer R, Finan TM. A *Sinorhizobium meliloti* minE mutant has an  
947 altered morphology and exhibits defects in legume symbiosis. Microbiology. 2007;153(Pt  
948 2):375-87. Epub 2007/01/30. doi: 10.1099/mic.0.2006/001362-0. PMID: 17259609.
- 949 25. Latch JN, Margolin W. Generation of buds, swellings, and branches instead of filaments  
950 after blocking the cell cycle of *Rhizobium meliloti*. J Bacteriol. 1997;179(7):2373-81. Epub  
951 1997/04/01. PMID: 9079925.
- 952 26. Fujiwara T, Fukui S. Effect OF D-alanine and mitomycin-c on cell morphology of  
953 *Agrobacterium tumefaciens*. Gen App Microbiol. 1974;20(6):345-9. doi: 10.2323/jgam.20.345.
- 954 27. Zupan JR, Cameron TA, Anderson-Furgeson J, Zambryski PC. Dynamic FtsA and FtsZ  
955 localization and outer membrane alterations during polar growth and cell division in  
956 *Agrobacterium tumefaciens*. Proc Natl Acad Sci U S A. 2013;110(22):9060-5. doi:  
957 10.1073/pnas.1307241110. PMID: 23674672.
- 958 28. Figueroa-Cuilan WM, Brown PJB. Cell wall biogenesis during elongation and division in  
959 the plant pathogen *Agrobacterium tumefaciens*. Curr Top Microbiol Immunol. 2018. Epub  
960 2018/05/29. doi: 10.1007/82\_2018\_92. PMID: 29808336.
- 961 29. Brown PJB, de Pedro MA, Kysela DT, Van der Henst C, Kim J, De Bolle X, et al. Polar  
962 growth in the Alphaproteobacterial order Rhizobiales. Proc Natl Acad Sci U S A.  
963 2012;109(5):1697-701. doi: 10.1073/pnas.1114476109.
- 964 30. Cameron TA, Anderson-Furgeson J, Zupan JR, Zik JJ, Zambryski PC. Peptidoglycan  
965 synthesis machinery in *Agrobacterium tumefaciens* during unipolar growth and cell division.  
966 mBio. 2014;5(3). doi: 10.1128/mBio.01219-14. PMID: 24865559.

- 967 31. Goley ED, Dye NA, Werner JN, Gitai Z, Shapiro L. Imaging-based identification of a  
968 critical regulator of FtsZ protofilament curvature in *Caulobacter*. *Mol Cell*. 2010;39(6):975-87.  
969 Epub 2010/09/25. doi: 10.1016/j.molcel.2010.08.027. PMID: 20864042.
- 970 32. Figueroa-Cuilan W, Daniel JJ, Howell M, Sulaiman A, Brown PJ. Mini-Tn7 Insertion in  
971 an artificial *attTn7* site enables depletion of the essential master regulator CtrA in the  
972 phytopathogen *Agrobacterium tumefaciens*. *Appl Environ Microbiol*. 2016;82(16):5015-25.  
973 Epub 2016/06/12. doi: 10.1128/aem.01392-16. PMID: 27287320.
- 974 33. Ortiz C, Natale P, Cueto L, Vicente M. The keepers of the ring: regulators of FtsZ  
975 assembly. *FEMS Microbiol Rev*. 2016;40(1):57-67. Epub 2015/09/18. doi:  
976 10.1093/femsre/fuv040. PMID: 26377318.
- 977 34. Wood DW, Setubal JC, Kaul R, Monks DE, Kitajima JP, Okura VK, et al. The genome  
978 of the natural genetic engineer *Agrobacterium tumefaciens* C58. *Science*. 2001;294(5550):2317-  
979 23. Epub 2001/12/18. doi: 10.1126/science.1066804. PMID: 11743193.
- 980 35. Goodner B, Hinkle G, Gattung S, Miller N, Blanchard M, Quorollo B, et al. Genome  
981 sequence of the plant pathogen and biotechnology agent *Agrobacterium tumefaciens* C58.  
982 *Science*. 2001;294(5550):2323-8. Epub 2001/12/18. doi: 10.1126/science.1066803. PMID:  
983 11743194.
- 984 36. Curtis PD, Brun YV. Identification of essential alphaproteobacterial genes reveals  
985 operational variability in conserved developmental and cell cycle systems. *Mol Microbiol*.  
986 2014;93(4):713-35. doi: 10.1111/mmi.12686.
- 987 37. Vaughan S, Wickstead B, Gull K, Addinall SG. Molecular evolution of FtsZ protein  
988 sequences encoded within the genomes of archaea, bacteria, and eukaryota. *J Mol Evol*.  
989 2004;58(1):19-29. Epub 2004/01/27. doi: 10.1007/s00239-003-2523-5. PMID: 14743312.

- 990 38. Margolin W, Long SR. *Rhizobium meliloti* contains a novel second homolog of the cell  
991 division gene *ftsZ*. J Bacteriol. 1994;176(7):2033-43. Epub 1994/04/01. PMID: 8144471.
- 992 39. Muller FD, Raschdorf O, Nudelman H, Messerer M, Katzmann E, Plitzko JM, et al. The  
993 *FtsZ*-like protein *FtsZm* of *Magnetospirillum gryphiswaldense* likely interacts with its generic  
994 homolog and is required for biomineralization under nitrate deprivation. J Bacteriol.  
995 2014;196(3):650-9. Epub 2013/11/26. doi: 10.1128/jb.00804-13. PMID: 24272781.
- 996 40. Chen Y, Bjornson K, Redick SD, Erickson HP. A rapid fluorescence assay for *FtsZ*  
997 assembly indicates cooperative assembly with a dimer nucleus. Biophys J. 2005;88(1):505-14.  
998 Epub 2004/10/12. doi: 10.1529/biophysj.104.044149. PMID: 15475583.
- 999 41. Olson BJ, Wang Q, Osteryoung KW. GTP-dependent heteropolymer formation and  
1000 bundling of chloroplast *FtsZ1* and *FtsZ2*. J Biol Chem. 2010;285(27):20634-43. Epub  
1001 2010/04/28. doi: 10.1074/jbc.M110.122614. PMID: 20421292.
- 1002 42. El-Kafafi el S, Mukherjee S, El-Shami M, Putaux JL, Block MA, Pignot-Paintrand I, et  
1003 al. The plastid division proteins, *FtsZ1* and *FtsZ2*, differ in their biochemical properties and sub-  
1004 plastidial localization. Biochem J. 2005;387(Pt 3):669-76. Epub 2004/12/17. doi:  
1005 10.1042/bj20041281. PMID: 15601251.
- 1006 43. TerBush AD, MacCready JS, Chen C, Ducat DC, Osteryoung KW. Conserved dynamics  
1007 of chloroplast cytoskeletal *FtsZ* proteins across photosynthetic lineages. Plant Physiol.  
1008 2018;176(1):295-306. Epub 2017/08/18. doi: 10.1104/pp.17.00558. PMID: 28814573.
- 1009 44. Richards DM, Hempel AM, Flardh K, Buttner MJ, Howard M. Mechanistic basis of  
1010 branch-site selection in filamentous bacteria. PLoS Comput Biol. 2012;8(3):e1002423. Epub  
1011 2012/03/17. doi: 10.1371/journal.pcbi.1002423. PMID: 22423220.

- 1012 45. Howell M, Aliashkevich A, Salisbury AK, Cava F, Bowman GR, Brown PJB. Absence  
1013 of the polar organizing protein PopZ results in reduced and asymmetric cell division in  
1014 *Agrobacterium tumefaciens*. J Bacteriol. 2017;199(17). Epub 2017/06/21. doi: 10.1128/jb.00101-  
1015 17. PMID: 28630123.
- 1016 46. Ehrle HM, Guidry JT, Iacovetto R, Salisbury AK, Sandidge DJ, Bowman GR. Polar  
1017 organizing protein PopZ is required for chromosome segregation in *Agrobacterium tumefaciens*.  
1018 J Bacteriol. 2017;199(17). Epub 2017/06/21. doi: 10.1128/jb.00111-17. PMID: 28630129.
- 1019 47. Grangeon R, Zupan JR, Anderson-Furgeson J, Zambryski PC. PopZ identifies the new  
1020 pole, and PodJ identifies the old pole during polar growth in *Agrobacterium tumefaciens*. Proc  
1021 Natl Acad Sci U S A. 2015;112(37):11666-71. Epub 2015/09/02. doi: 10.1073/pnas.1515544112.  
1022 PMID: 26324921.
- 1023 48. Thanbichler M. Synchronization of chromosome dynamics and cell division in bacteria.  
1024 Cold Spring Harb Perspect Biol. 2010;2(1):a000331. Epub 2010/02/26. doi:  
1025 10.1101/cshperspect.a000331. PMID: 20182599.
- 1026 49. Kuru E, Velocity Hughes H, Brown PJ, Hall E, Tekkam S, Cava F, et al. *In situ* probing  
1027 of newly synthesized peptidoglycan in live bacteria with fluorescent D-amino acids. Angew  
1028 Chem Int Ed Engl. 2012;51(50):12519-23. doi: 10.1002/anie.201206749. PMID: 23055266.
- 1029 50. Alvarez L, Hernandez SB, de Pedro MA, Cava F. Ultra-sensitive, high-resolution liquid  
1030 chromatography methods for the high-throughput quantitative analysis of bacterial cell wall  
1031 chemistry and structure. Methods Mol Biol. 2016;1440:11-27. Epub 2016/06/18. doi:  
1032 10.1007/978-1-4939-3676-2\_2. PMID: 27311661.
- 1033 51. Szwedziak P, Wang Q, Freund SM, Lowe J. FtsA forms actin-like protofilaments. Embo  
1034 j. 2012;31(10):2249-60. Epub 2012/04/05. doi: 10.1038/emboj.2012.76. PMID: 22473211.

- 1035 52. Ma X, Margolin W. Genetic and functional analyses of the conserved C-terminal core  
1036 domain of *Escherichia coli* FtsZ. J Bacteriol. 1999;181(24):7531-44. Epub 1999/12/22. PMID:  
1037 10601211.
- 1038 53. Sundararajan K, Goley ED. The intrinsically disordered C-terminal linker of FtsZ  
1039 regulates protofilament dynamics and superstructure in vitro. J Biol Chem. 2017;292(50):20509-  
1040 27. Epub 2017/11/02. doi: 10.1074/jbc.M117.809939. PMID: 29089389.
- 1041 54. Buske PJ, Levin PA. A flexible C-terminal linker is required for proper FtsZ assembly in  
1042 vitro and cytokinetic ring formation in vivo. Mol Microbiol. 2013;89(2):249-63. Epub  
1043 2013/05/23. doi: 10.1111/mmi.12272. PMID: 23692518.
- 1044 55. Gardner KA, Moore DA, Erickson HP. The C-terminal linker of *Escherichia coli* FtsZ  
1045 functions as an intrinsically disordered peptide. Mol Microbiol. 2013;89(2):264-75. Epub  
1046 2013/05/30. doi: 10.1111/mmi.12279. PMID: 23714328.
- 1047 56. Khan SR, Gaines J, Roop RM, 2nd, Farrand SK. Broad-host-range expression vectors  
1048 with tightly regulated promoters and their use to examine the influence of TraR and TraM  
1049 expression on Ti plasmid quorum sensing. Appl Environ Microbiol. 2008;74(16):5053-62. Epub  
1050 2008/07/09. doi: 10.1128/aem.01098-08. PMID: 18606801.
- 1051 57. Kaczmarczyk A, Vorholt JA, Francez-Charlot A. Cumate-inducible gene expression  
1052 system for sphingomonads and other alphaproteobacteria. Appl Environ Microbiol.  
1053 2013;79(21):6795-802. Epub 2013/09/03. doi: 10.1128/aem.02296-13. PMID: 23995928.
- 1054 58. Eaton RW. p-Cumate catabolic pathway in *Pseudomonas putida* Fl: cloning and  
1055 characterization of DNA carrying the cmt operon. J Bacteriol. 1996;178(5):1351-62. Epub  
1056 1996/03/01. PMID: 8631713.



- 1057 59. Wang X, Huang J, Mukherjee A, Cao C, Lutkenhaus J. Analysis of the interaction of  
1058 FtsZ with itself, GTP, and FtsA. *J Bacteriol.* 1997;179(17):5551-9. Epub 1997/09/01. PMID:  
1059 9287012.
- 1060 60. Pichoff S, Lutkenhaus J. Identification of a region of FtsA required for interaction with  
1061 FtsZ. *Mol Microbiol.* 2007;64(4):1129-38. Epub 2007/05/16. doi: 10.1111/j.1365-  
1062 2958.2007.05735.x. PMID: 17501933.
- 1063 61. Moll A, Thanbichler M. FtsN-like proteins are conserved components of the cell division  
1064 machinery in proteobacteria. *Mol Microbiol.* 2009;72(4):1037-53. Epub 2009/04/30. doi:  
1065 10.1111/j.1365-2958.2009.06706.x. PMID: 19400794.
- 1066 62. Cameron TA, Zupan JR, Zambryski PC. The essential features and modes of bacterial  
1067 polar growth. *Trends in Microbiology.* 2015;23(6):347-53. doi: 10.1016/j.tim.2015.01.003.
- 1068 63. Meier EL, Razavi S, Inoue T, Goley ED. A novel membrane anchor for FtsZ is linked to  
1069 cell wall hydrolysis in *Caulobacter crescentus*. *Mol Microbiol.* 2016;101(2):265-80. Epub  
1070 2016/03/31. doi: 10.1111/mmi.13388. PMID: 27028265.
- 1071 64. Fraipont C, Alexeeva S, Wolf B, van der Ploeg R, Schloesser M, den Blaauwen T, et al.  
1072 The integral membrane FtsW protein and peptidoglycan synthase PBP3 form a subcomplex in  
1073 *Escherichia coli*. *Microbiology.* 2011;157(Pt 1):251-9. Epub 2010/09/18. doi:  
1074 10.1099/mic.0.040071-0. PMID: 20847002.
- 1075 65. Grangeon R, Zupan J, Jeon Y, Zambryski PC. Loss of PopZ At activity in *Agrobacterium*  
1076 *tumefaciens* by Deletion or Depletion Leads to Multiple Growth Poles, Minicells, and Growth  
1077 Defects. *MBio.* 2017;8(6). Epub 2017/11/16. doi: 10.1128/mBio.01881-17. PMID: 29138309.

- 1078 66. Rowlett VW, Margolin W. The Min system and other nucleoid-independent regulators of  
1079 Z ring positioning. *Front Microbiol.* 2015;6:478. Epub 2015/06/02. doi:  
1080 10.3389/fmicb.2015.00478. PMID: 26029202.
- 1081 67. Monahan LG, Hajduk IV, Blaber SP, Charles IG, Harry EJ. Coordinating bacterial cell  
1082 division with nutrient availability: a role for glycolysis. *MBio.* 2014;5(3):e00935-14. Epub  
1083 2014/05/16. doi: 10.1128/mBio.00935-14. PMID: 24825009.
- 1084 68. Flores SA, Howell M, Daniel JJ, Piccolo R, Brown PJB. Absence of the Min system does  
1085 not cause major cell division defects in *Agrobacterium tumefaciens*. *Front Microbiol.*  
1086 2018;9:681. Epub 2018/04/25. doi: 10.3389/fmicb.2018.00681. PMID: 29686659.
- 1087 69. Mosyak L, Zhang Y, Glasfeld E, Haney S, Stahl M, Seehra J, et al. The bacterial cell-  
1088 division protein ZipA and its interaction with an FtsZ fragment revealed by X-ray  
1089 crystallography. *Embo j.* 2000;19(13):3179-91. Epub 2000/07/06. doi:  
1090 10.1093/emboj/19.13.3179. PMID: 10880432.
- 1091 70. Haney SA, Glasfeld E, Hale C, Keeney D, He Z, de Boer P. Genetic analysis of the  
1092 *Escherichia coli* FtsZ.ZipA interaction in the yeast two-hybrid system. Characterization of FtsZ  
1093 residues essential for the interactions with ZipA and with FtsA. *J Biol Chem.*  
1094 2001;276(15):11980-7. Epub 2001/03/30. doi: 10.1074/jbc.M009810200. PMID: 11278571.
- 1095 71. Cho H, Wivagg CN, Kapoor M, Barry Z, Rohs PD, Suh H, et al. Bacterial cell wall  
1096 biogenesis is mediated by SEDS and PBP polymerase families functioning semi-autonomously.  
1097 *Nat Microbiol.* 2016:16172. Epub 2016/09/20. doi: 10.1038/nmicrobiol.2016.172. PMID:  
1098 27643381.

- 1099 72. Meeske AJ, Riley EP, Robins WP, Uehara T, Mekalanos JJ, Kahne D, et al. SEDS  
1100 proteins are a widespread family of bacterial cell wall polymerases. *Nature*.  
1101 2016;537(7622):634-8. Epub 2016/08/16. doi: 10.1038/nature19331. PMID: 27525505.
- 1102 73. Emami K, Guyet A, Kawai Y, Devi J, Wu LJ, Allenby N, et al. RodA as the missing  
1103 glycosyltransferase in *Bacillus subtilis* and antibiotic discovery for the peptidoglycan polymerase  
1104 pathway. *Nat Microbiol*. 2017;2:16253. Epub 2017/01/14. doi: 10.1038/nmicrobiol.2016.253.  
1105 PMID: 28085152.
- 1106 74. Botta GA, Park JT. Evidence for involvement of penicillin-binding protein 3 in murein  
1107 synthesis during septation but not during cell elongation. *J Bacteriol*. 1981;145(1):333-40. Epub  
1108 1981/01/01. PMID: 6450748.
- 1109 75. Morton ER, Fuqua C. Laboratory maintenance of *Agrobacterium*. *Curr Protoc Microbiol*.  
1110 2012;Chapter 1:Unit3D 1. doi: 10.1002/9780471729259.mc03d01s24. PMID: 22307549.
- 1111 76. Choi YJ, Morel L, Le Francois T, Bourque D, Bourget L, Groleau D, et al. Novel,  
1112 versatile, and tightly regulated expression system for *Escherichia coli* strains. *Appl Environ*  
1113 *Microbiol*. 2010;76(15):5058-66. Epub 2010/06/22. doi: 10.1128/aem.00413-10. PMID:  
1114 20562288.
- 1115 77. Denkovskiene E, Paskevicius S, Werner S, Gleba Y, Razanskiene A. Inducible  
1116 expression of *Agrobacterium* Virulence gene VirE2 for stringent regulation of T-DNA transfer in  
1117 plant transient expression systems. *Mol Plant Microbe Interact*. 2015;28(11):1247-55. Epub  
1118 2015/08/22. doi: 10.1094/mpmi-05-15-0102-r. PMID: 26292850.
- 1119 78. Morton ER, Fuqua C. Unit 3D.2 genetic manipulation of *Agrobacterium*. *Curr Protoc*  
1120 *Microbiol*. 2012;Chapter:Unit-3D.2. doi: 10.1002/9780471729259.mc03d02s25. PMID:  
1121 22549163.

- 1122 79. Thanbichler M, Iniesta AA, Shapiro L. A comprehensive set of plasmids for vanillate-  
1123 and xylose-inducible gene expression in *Caulobacter crescentus*. *Nucleic Acids Res.*  
1124 2007;35(20):e137. Epub 2007/10/26. doi: 10.1093/nar/gkm818. PMID: 17959646.
- 1125 80. Howell M, J. Daniel J, J.B. Brown P. Live cell fluorescence microscopy to observe  
1126 essential processes during microbial cell growth.: *J Vis Exp*; 2017.
- 1127 81. Ducret A, Quardokus EM, Brun YV. MicrobeJ, a tool for high throughput bacterial cell  
1128 detection and quantitative analysis. *Nat Microbiol.* 2016;1(7):16077. Epub 2016/08/31. doi:  
1129 10.1038/nmicrobiol.2016.77. PMID: 27572972.
- 1130 82. Lariviere PJ, Szwedziak P, Mahone CR, Lowe J, Goley ED. FzlA, an essential regulator  
1131 of FtsZ filament curvature, controls constriction rate during *Caulobacter* division. *Mol*  
1132 *Microbiol.* 2018;107(2):180-97. Epub 2017/11/10. doi: 10.1111/mmi.13876. PMID: 29119622.
- 1133
- 1134

1135

## 1136 **Figure Legends**

1137

1138 **Figure 1. Characterization of FtsZ homologs in *A. tumefaciens*.** A) Domain schematic of FtsZ  
1139 homologs in *A. tumefaciens*. Note that domains are not drawn to scale. B) Representative image  
1140 of localization patterns for each homolog. FtsZ<sub>AT</sub>-sfGFP and FtsZ<sub>1</sub>-sfGFP show mid-cell ring  
1141 formation while FtsZ<sub>3</sub>-sfGFP fails to localize. C) Cell viability is shown by spotting serial  
1142 dilutions.  $\Delta ftsZ_1$ ,  $\Delta ftsZ_3$ , and  $+ftsZ_{AT}$  have similar viability to WT, while  $-ftsZ_{AT}$  displays a drastic  
1143 decrease in viability. D) Cell morphology and microcolony formation of  $\Delta ftsZ_1$  and  $\Delta ftsZ_3$  are  
1144 similar to WT, while  $-ftsZ_{AT}$  results in long branched cells that fail to divide. All scale bars are set  
1145 to 2  $\mu$ m.

1146 **Figure 1- Figure Supplement 1. Cell growth and morphology of *ftsZ* mutants.** A.) Western  
1147 blot analysis showing the depletion of FtsZ<sub>AT</sub> after the removal of inducer. B) Cell lengths of WT,  
1148  $\Delta ftsZ_1$ ,  $\Delta ftsZ_3$ , and induced  $ftsZ_{AT}$  are indistinguishable. C) Cell area in WT and induced  $ftsZ_{AT}$   
1149 are the same while cells depleted of FtsZ<sub>AT</sub> for 8 and 14 hours accumulate cell area.

1150 **Figure 2. Deletion of multiple *ftsZ* homologs does not yield an additive effect.** A) Cell  
1151 viability (top) and morphology (bottom) of the double mutant  $\Delta ftsZ_1\Delta ftsZ_3$  is indistinguishable  
1152 from WT. B) Cell viability (top) and morphology (bottom) of  $\Delta ftsZ_1$ ,  $\Delta ftsZ_3$ , or  $\Delta ftsZ_1\Delta ftsZ_3$   
1153 during FtsZ<sub>AT</sub> depletion are indistinguishable from FtsZ<sub>AT</sub> depletion alone. All scale bars are set  
1154 to 2  $\mu$ m. Black bar denotes  $ftsZ_{AT}$  depletion strain background.

1155 **Figure 3. FtsZ<sub>1</sub> requires FtsZ<sub>AT</sub> to polymerize *in vitro* and to localize in cells.** A) FtsZ<sub>1</sub>-  
1156 sfGFP forms midcell rings which constrict in WT and when  $ftsZ_{AT}$  is induced. FtsZ<sub>1</sub>-sfGFP fails  
1157 to constrict early rings and disassembles during FtsZ<sub>AT</sub> depletion. Scale bar is set to 2  $\mu$ m. B)

1158 Light scattering over time for purified proteins at the indicated concentrations. FtsZ<sub>AT</sub>  
1159 polymerizes at concentrations above 2  $\mu$ M, but FtsZ<sub>I</sub> does not polymerize. GTP (2 mM) was  
1160 added where indicated by the arrow to induce polymerization. Experiments were performed in  
1161 triplicate and mean curves are shown. C) Negative stain TEM of the indicated proteins. Co-  
1162 polymers of FtsZ<sub>AT</sub> and FtsZ<sub>I</sub> are indistinguishable from FtsZ<sub>AT</sub> polymers. Scale bar is set to 100  
1163 nm. D) Inorganic phosphate concentration in solution over time in the presence of the indicated  
1164 proteins and protein concentrations. Co-polymers of FtsZ<sub>AT</sub> and FtsZ<sub>I</sub> consume GTP at the same  
1165 rate as FtsZ<sub>AT</sub> homopolymers at equivalent total FtsZ concentration. Reactions were performed  
1166 in triplicate and mean  $\pm$  standard error is plotted. E) Tryptophan fluorescence over time for the  
1167 indicated proteins. FtsZ<sub>I</sub>-L71W (red) shows no polymerization (Trp fluorescence) on its own, but  
1168 can co-polymerize with added FtsZ<sub>AT</sub> (purple). GTP (50  $\mu$ M) was added where indicated by the  
1169 arrow to induce polymerization. Experiments were performed in triplicate and representative  
1170 curves are shown.

1171 **Figure 4. Characterization of genomic content during FtsZ<sub>AT</sub> depletion.** A) Timelapse  
1172 microscopy in minutes demonstrates proper cell division and microcolony formation in +*ftsZ<sub>AT</sub>*  
1173 induced with IPTG (top panel). Timelapse during depletion of FtsZ<sub>AT</sub> demonstrates branches  
1174 forming from tip splitting events (bottom panel). B) Timelapse microscopy shows that PopZ-  
1175 YFP maintains polar localization during elongation and dissociates moving to the mid-cell at  
1176 division in WT and when *ftsZ<sub>AT</sub>* is induced. PopZ-YFP becomes trapped at the growth poles  
1177 during FtsZ<sub>AT</sub> depletion. C) Sytox Orange labeled DNA is diffuse throughout young cells and  
1178 separated nucleoids are seen in late divisional cells in WT and when FtsZ<sub>AT</sub> is induced. These  
1179 DNA free regions are marked with an asterisk. Nucleoids fail to form, as diffuse DNA labeling is  
1180 observed during FtsZ<sub>AT</sub> depletion at both 8 h and 14 h depletion timepoints. D) Timelapse

1181 microscopy demonstrates YFP-ParB1 form a single focus at the old pole in WT and when *ftsZ<sub>AT</sub>*  
1182 is induced. A second focus then translocates the cell length to the growth pole. Timelapse  
1183 microscopy during *FtsZ<sub>AT</sub>* depletion reveals a third focus which translocates the cell towards an  
1184 ectopic pole. E) Quantitation of YFP-ParB1 foci plotted against cell area. Number of foci  
1185 increase as cell area increases. All scale bars are set to 2  $\mu$ m.

1186 **Movie 1. Growth and morphological changes during *FtsZ<sub>AT</sub>* depletion.** Cells were washed to  
1187 remove inducer and grown in liquid ATGN for 4 hours before spotting on a ATGN pad. Images  
1188 were acquired every ten minutes and movie is played at 10 frames per second for a total of 145  
1189 frames.

1190 **Figure 5. Characterization of polar peptidoglycan synthesis during *FtsZ<sub>AT</sub>* depletion.** A)  
1191 FDAA labels active peptidoglycan synthesis at a single growing pole and septum in WT and  
1192 cells depleted of *FtsZ<sub>AT</sub>* for 0 h. As *FtsZ<sub>AT</sub>* is depleted for 8 and 14 h, multiple growth poles are  
1193 labeled, and septum labeling is lost. B) Quantitation of the major muropeptide peaks in *ftsZ<sub>AT</sub>*  
1194 depletion strain induced and depleted. C) Abundance of total monomers, dimers, and trimers in  
1195 the muropeptide profile in *ftsZ<sub>AT</sub>* depletion strain. D) Abundance of total LD and DD  
1196 crosslinkage in *ftsZ<sub>AT</sub>* depletion strain induced. For B,C,and D, data shown are the average  
1197 abundance of each muropeptide and are taken from analysis of three independent biological  
1198 samples of *ftsZ<sub>AT</sub>* depletion strain induced (black bars) and depleted for 14 h (gray bars).  
1199 Statistical was calculated by t-tests and is indicated with an asterisk (P-value <0.05 (\*), <0.005  
1200 (\*\*), <0.001 (\*\*\*)). E) Timelapse microscopy of LDTP<sub>0845</sub>-sfGFP in WT and when *ftsZ<sub>AT</sub>* is  
1201 induced yields growth pole localization during elongation and mid-cell localization during  
1202 septum formation. In cells depleted of *FtsZ<sub>AT</sub>*, localization is trapped at the growing poles. All  
1203 scale bars are set to 2  $\mu$ m.

1204 **Figure 5- Figure Supplement 1. Peptidoglycan analysis of control strains.** A) UPLC spectra  
1205 of mucopeptides derived from WT cells. Major mucopeptides are labeled. M= monomers, D=  
1206 dimers, T= trimers. Numbers indicate the length of the mucopeptide stems and the position of  
1207 crosslink in dimers and trimers. B) Quantitation of the major mucopeptide peaks in WT with  
1208 IPTG (black), WT without IPTG (black with gray outline), and *ftsZ<sub>AT</sub>* depletion strain induced  
1209 with IPTG (Gray). Data shown is the average abundance of each mucopeptide and is taken from  
1210 analysis of three independent biological samples. Statistical significance is indicated with an  
1211 asterisk.

1212 **Figure 6. Functional analysis of FtsZ<sub>AT</sub>ΔCTL and FtsZ<sub>AT</sub>ΔCTP.** A) Cell viability is measured  
1213 by spotting serial dilutions of *ftsZ<sub>AT</sub>* variants in the *ftsZ<sub>AT</sub>* depletion background. When  
1214 chromosomal *ftsZ<sub>AT</sub>* is induced by IPTG and plasmid driven *ftsZ<sub>AT</sub>* variants are uninduced, all  
1215 strains have similar viability (top left). When both chromosomal *ftsZ<sub>AT</sub>* is uninduced and plasmid  
1216 driven *ftsZ<sub>AT</sub>* variants are uninduced, all strains exhibit an equal decrease in viability (top right).  
1217 When chromosomal *ftsZ<sub>AT</sub>* is uninduced and plasmid driven *ftsZ<sub>AT</sub>* variants are induced by  
1218 cumate, FtsZ<sub>AT</sub> expression rescues viability, FtsZ<sub>AT</sub>ΔCTP partially rescues, and FtsZ<sub>AT</sub>ΔCTL  
1219 fails to rescue viability (bottom left). When both chromosomal *ftsZ<sub>AT</sub>* is induced with IPTG and  
1220 plasmid driven *ftsZ<sub>AT</sub>* variants are induced by cumate, FtsZ<sub>AT</sub>ΔCTL expression reduces viability  
1221 while other variants have no impact (bottom right). B) Representative images displaying  
1222 morphology and FDAA labeling while chromosomal *ftsZ<sub>AT</sub>* is uninduced and plasmid driven  
1223 *ftsZ<sub>AT</sub>* variants are induced for 6 and 14 h. C) Timelapse microscopy while chromosomal *ftsZ<sub>AT</sub>*  
1224 is uninduced and plasmid driven FtsZ<sub>AT</sub>ΔCTP is expressed reveal that polar growth fails to  
1225 terminate and undergoes tip splitting, although septum formation and cell division also take place  
1226 (top panel). Timelapse microscopy while chromosomal *ftsZ<sub>AT</sub>* is uninduced and plasmid driven



1227 FtsZ<sub>AT</sub>ΔCTL is expressed shows termination of polar growth and new pole formation near mid-  
1228 cell (bottom panel).

1229 **Figure 6- Figure Supplement 1. Validation of a cumate inducible vector in *A. tumefaciens*.**

1230 A) Sequence schematic of the cumate operon modified for use is pSRKKM-*sfGFP*. Regions are  
1231 color coded to match sequence found in Table S2. B) Representative image of WT cells  
1232 harboring pSRKKM-Pcym-*sfGFP* uninduced (left) and induced (right). C) Western blot analysis  
1233 comparing expression levels of *sfGFP* expressed from pRV, pSRKKM-Plac, and pSRKKM-  
1234 Pcym. D) Growth curve analysis of WT cells harboring pSRKKM-Pcym-empty induced with  
1235 different levels of cumate (left). pSRKKM-Pcym-*ftsZ<sub>AT</sub>* rescues chromosomal FtsZ<sub>AT</sub> depletion  
1236 with 0.01mM cumate (right).

1237 **Figure 7. FtsZ<sub>AT</sub> requires the CTL for robust PG biosynthesis and proper polymerization.**

1238 A.) Quantitation of the major muropeptide peaks in *ftsZ<sub>AT</sub>* depletion strain expressing an empty  
1239 plasmid, full length FtsZ<sub>AT</sub>, or FtsZ<sub>AT</sub>ΔCTL. B) Abundance of total monomers, dimers, and  
1240 trimers in the muropeptide profile. C) Abundance of total LD and DD crosslinkage. For A, B,  
1241 and C, data shown are the average abundance of each muropeptide and are taken from analysis  
1242 of three independent biological samples. Statistical significance is indicated with an asterisk. D.)  
1243 Negative stain TEM of the 4 μM of the indicated protein in the presence of 50 or 300 mM KCl.  
1244 FtsZ<sub>AT</sub>ΔCTL shows increased propensity to bundle at high salt. Scale bar is set at 100 nm. E.)  
1245 Phosphate in solution over time in the presence of indicated proteins in solution with 50 or 300  
1246 mM KCl. The rate of GTP hydrolysis by FtsZ<sub>AT</sub>ΔCTL is reduced under high salt conditions that  
1247 promote bundling.

1248 **Figure 8. FtsA is not required for termination of polar growth.** A) FtsA-*sfGFP* persists at  
1249 growth poles and forms mid-cell rings which constrict in WT (top panel). FtsA-*sfGFP* becomes

1250 trapped at the growth poles and foci split as the growth poles split during FtsZ<sub>AT</sub> depletion  
1251 (bottom panel). B) Timelapse microscopy shows cells expressing FtsA grow and divide normally  
1252 forming microcolonies (top panel). Cells depleted of FtsA terminate polar growth and form new  
1253 growth poles near the mid-cell (bottom panel). C) FDAAs label a single growth pole when FtsA  
1254 is present (top) and label multiple poles emerging from the mid-cell when FtsA is absent  
1255 (bottom). D) Timelapse microscopy during FtsA depletion shows PopZ-YFP localizes to the  
1256 growth poles and dissociates as growth is terminated. It then reappears at the new pole sites  
1257 (top). During FtsA depletion, FtsZ-sfGFP forms rings marking the future sites of pole formation  
1258 (bottom). All scale bars are set to 2  $\mu$ m.

1259 **Movie 2. Growth and morphological changes during FtsA depletion.** Cells were washed to  
1260 remove inducer and grown in liquid ATGN for 2 hours before spotting on a ATGN pad. Images  
1261 were acquired every ten minutes and movie is played at 10 frames per second for a total of 97  
1262 frames.

1263 **Figure 9. FtsW is not required for termination of polar growth** A) Timelapse microscopy  
1264 shows cells expressing FtsW grow and divide normally forming microcolonies (top panel). Cells  
1265 depleted of FtsW terminate polar growth and form new growth poles near the mid-cell (bottom  
1266 panel). B) FDAA labels a single growth pole when FtsW is present (top) and labels multiple  
1267 poles emerging from the mid-cell when FtsW is absent (bottom). C) Timelapse microscopy  
1268 during FtsW depletion shows PopZ-YFP localizes to the growth poles and dissociates as growth  
1269 is terminated. It then reappears at the new pole sites (top). During FtsW depletion, FtsZ-sfGFP  
1270 forms rings marking the future sites of pole formation (bottom).

1271

1272 **Movie 3. Growth and morphological changes during FtsW depletion.** Cells were washed to  
1273 remove inducer and grown in liquid ATGN for 4 hours before spotting on a ATGN pad. Images  
1274 were acquired every ten minutes and movie is played at 10 frames per second for a total of 85  
1275 frames.

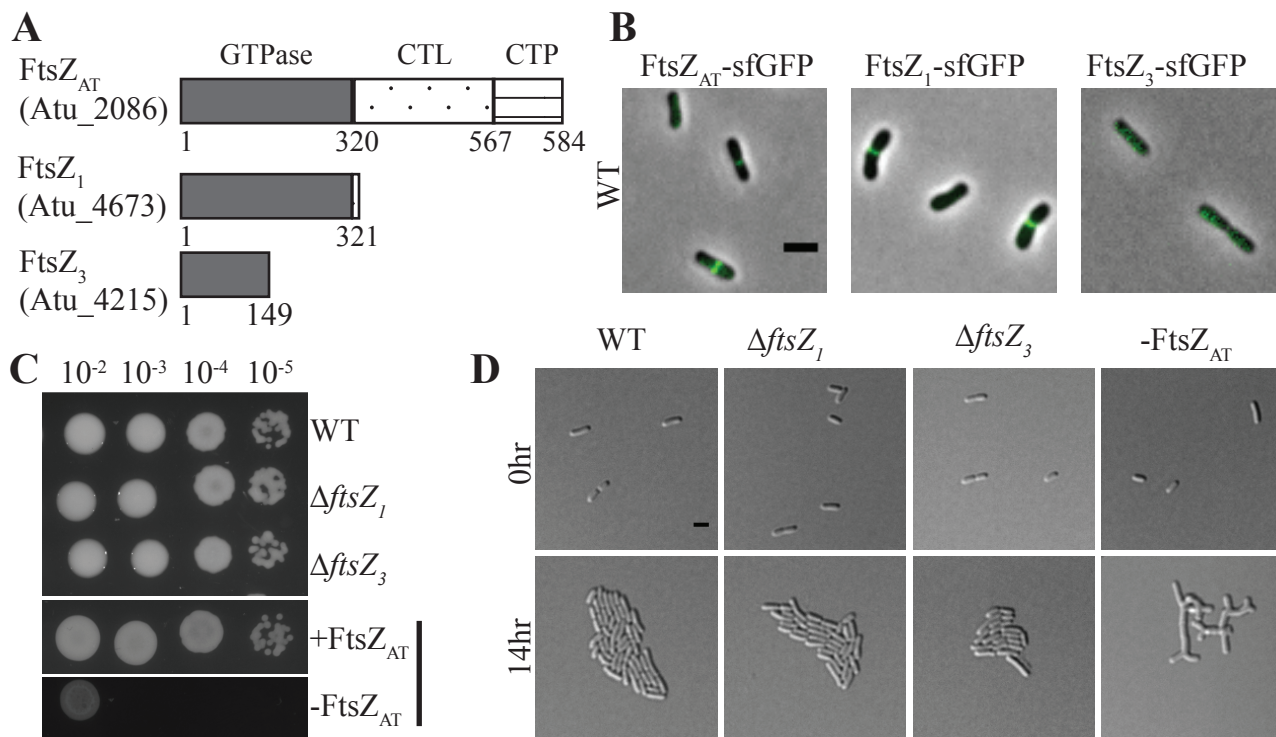

Figure 1

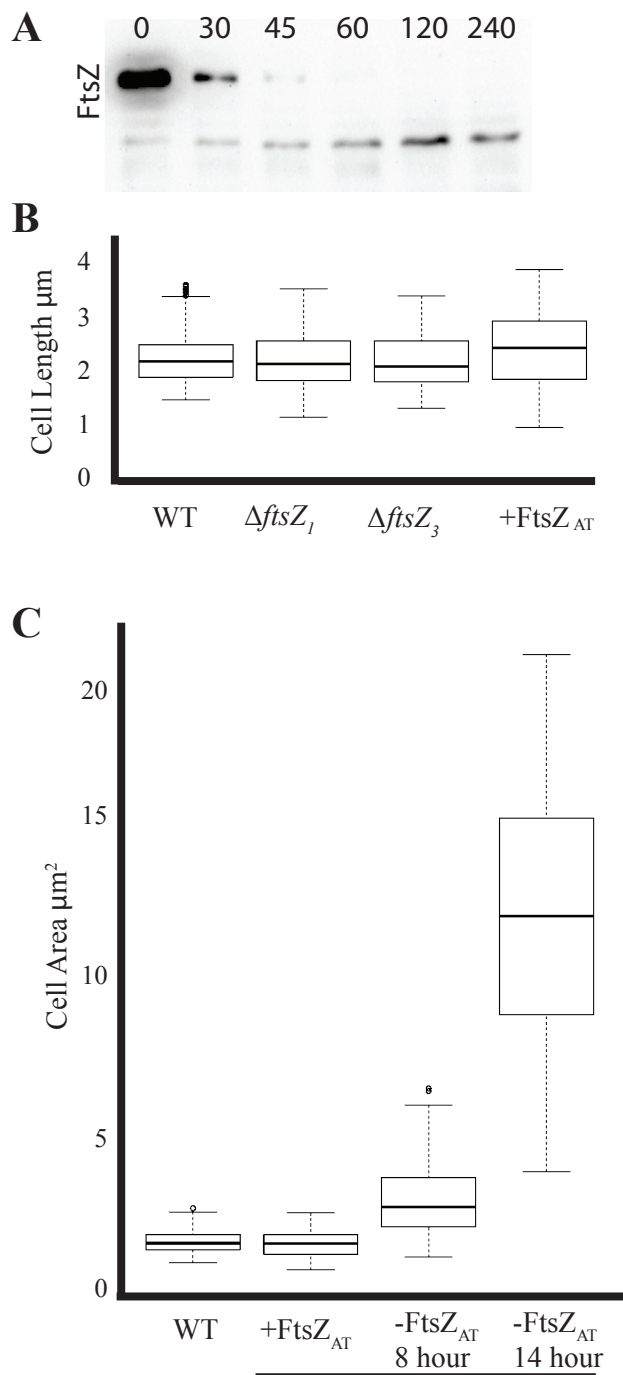

Figure 1- Figure Supplement 1

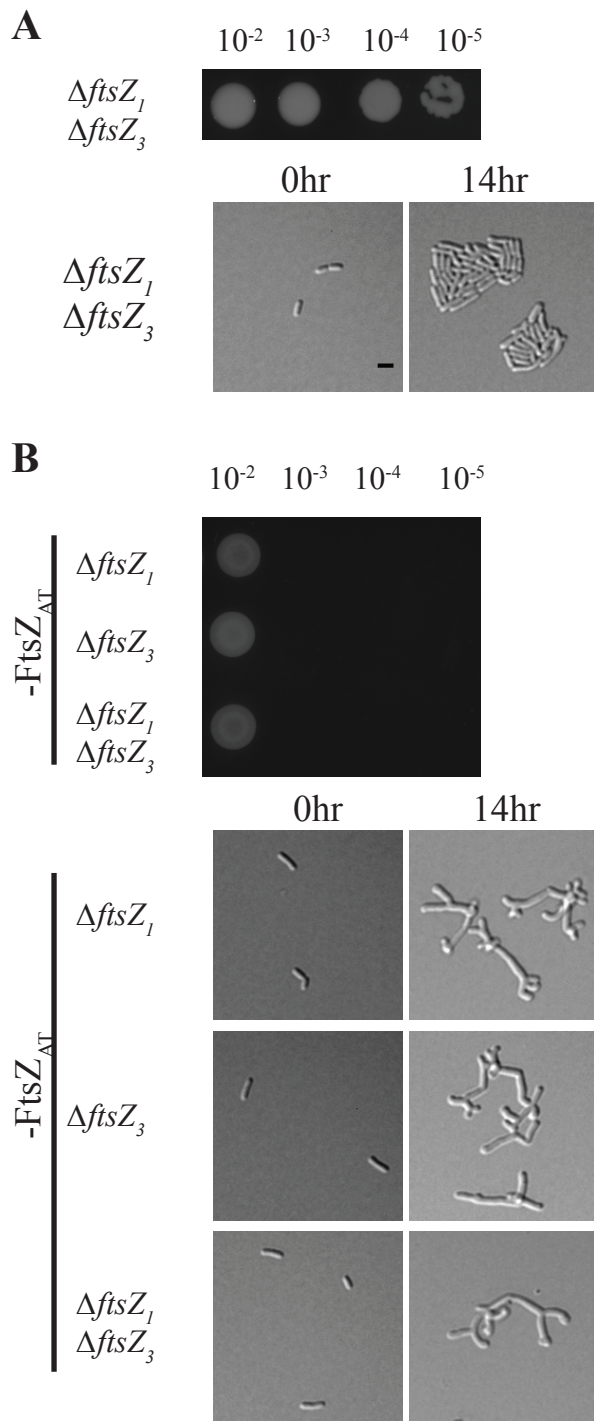

Figure 2

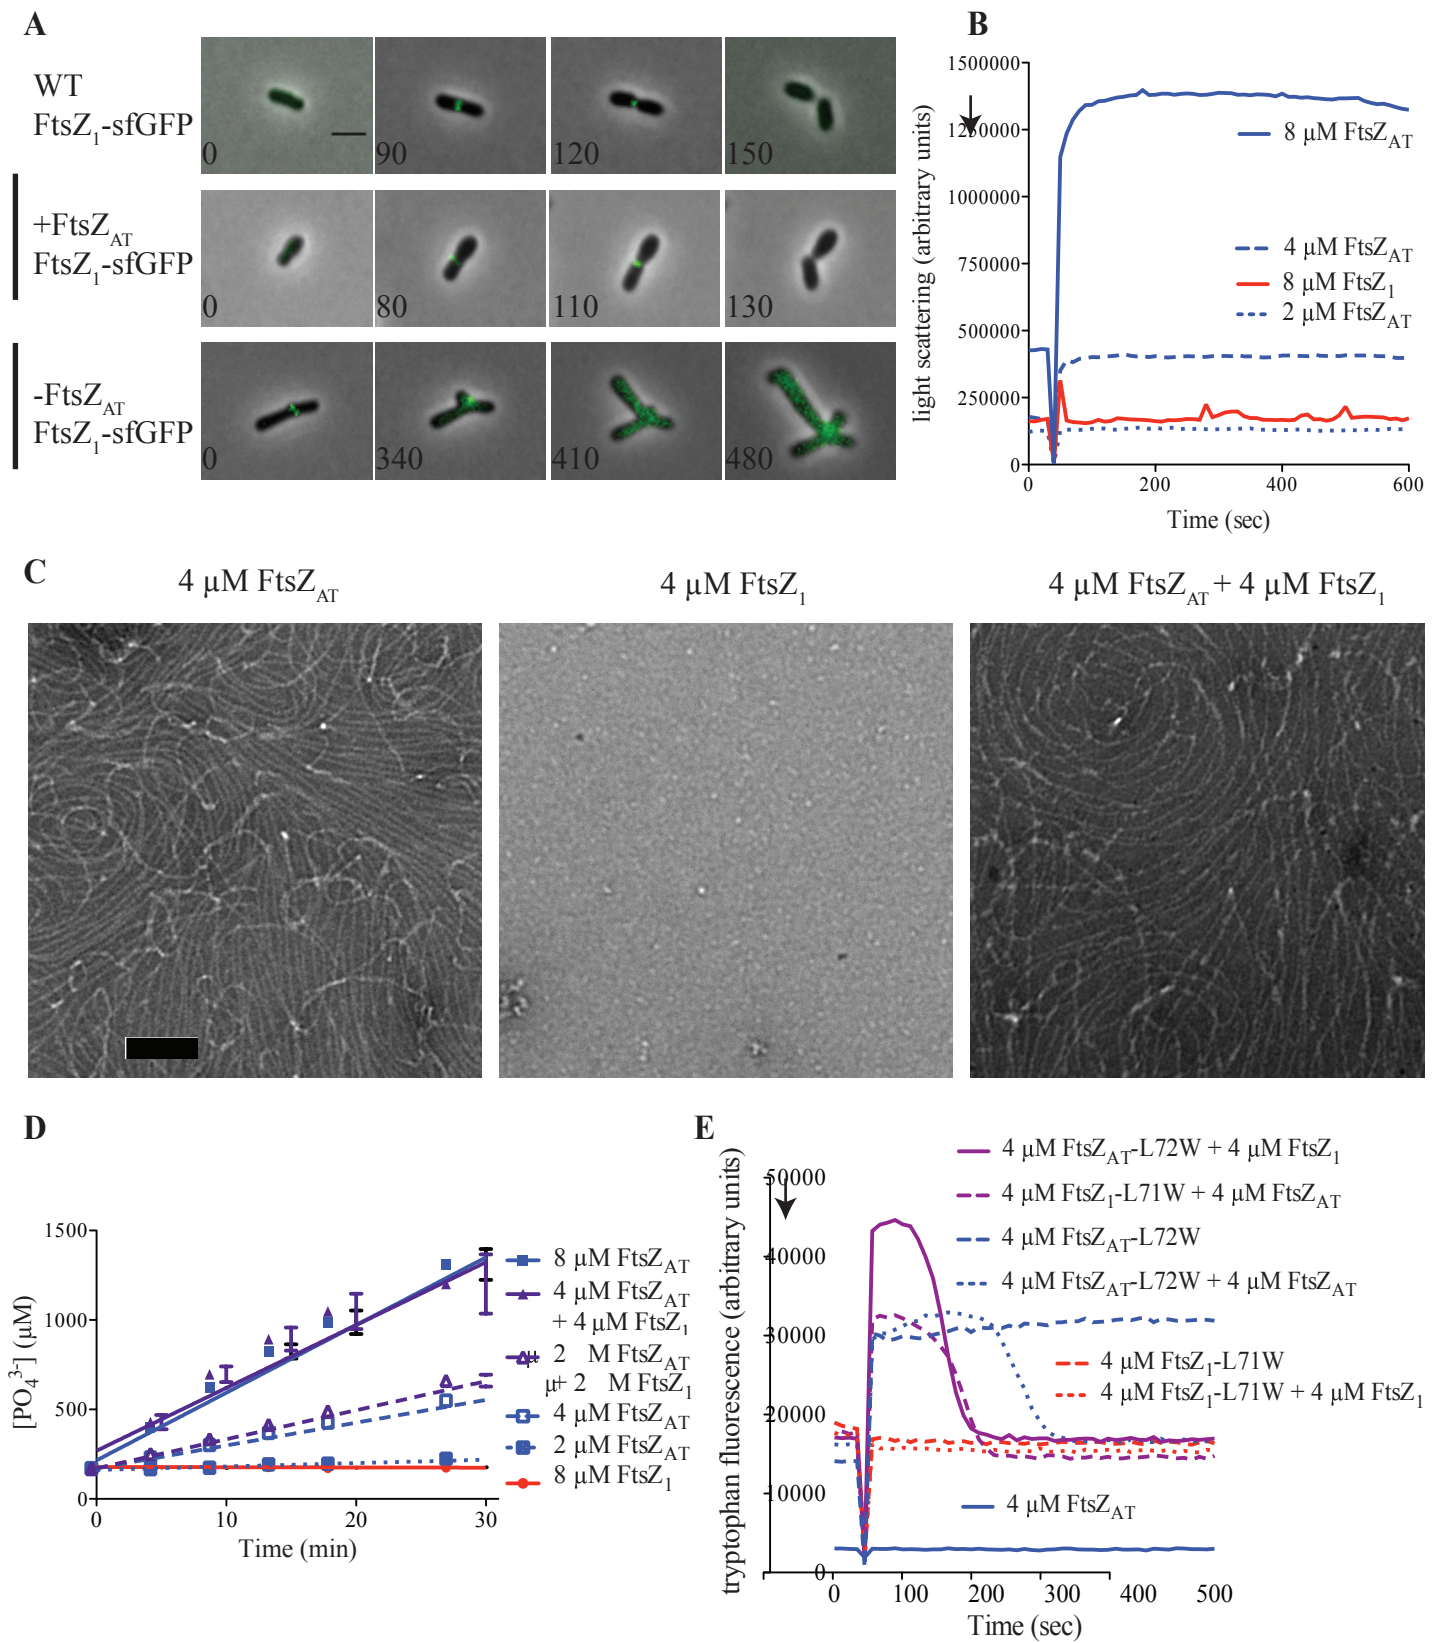

Figure 3

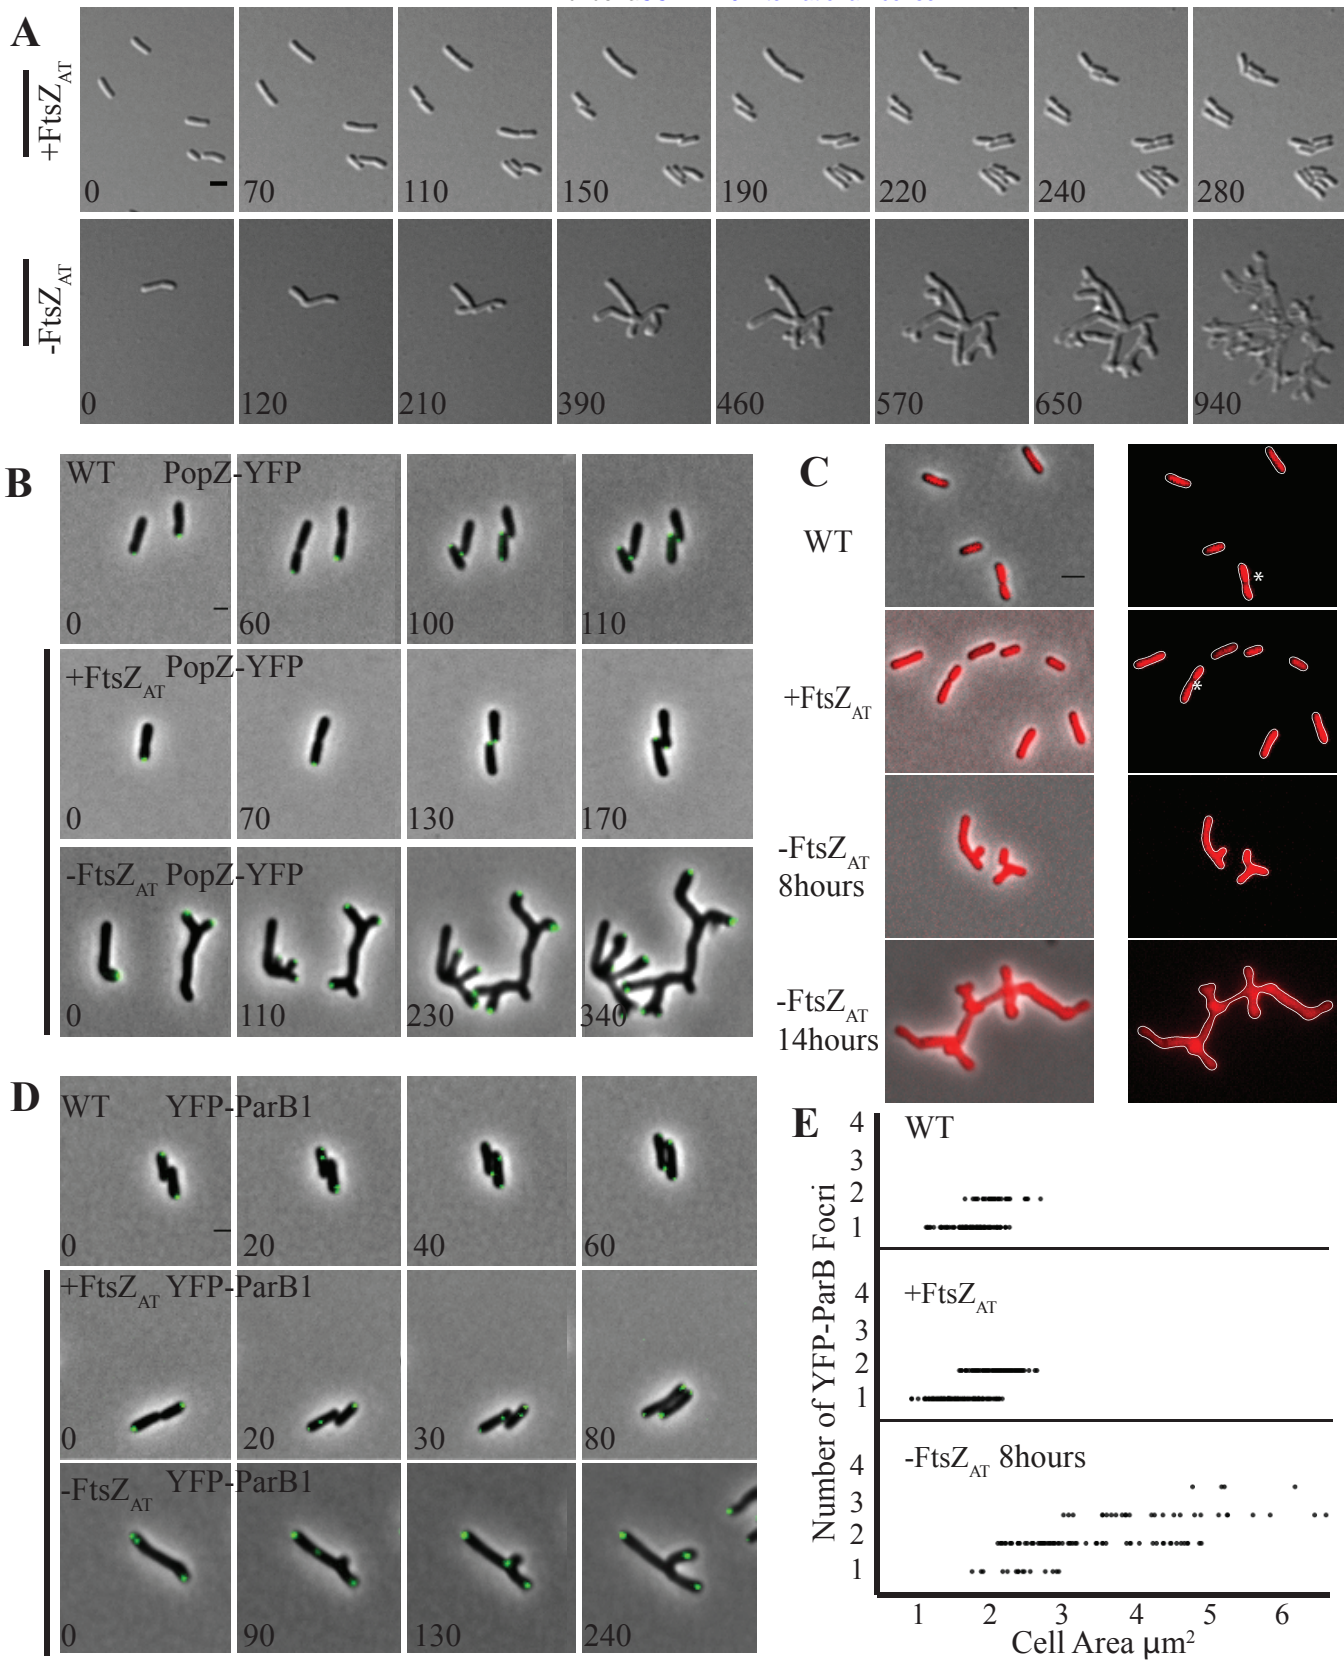

Figure 4



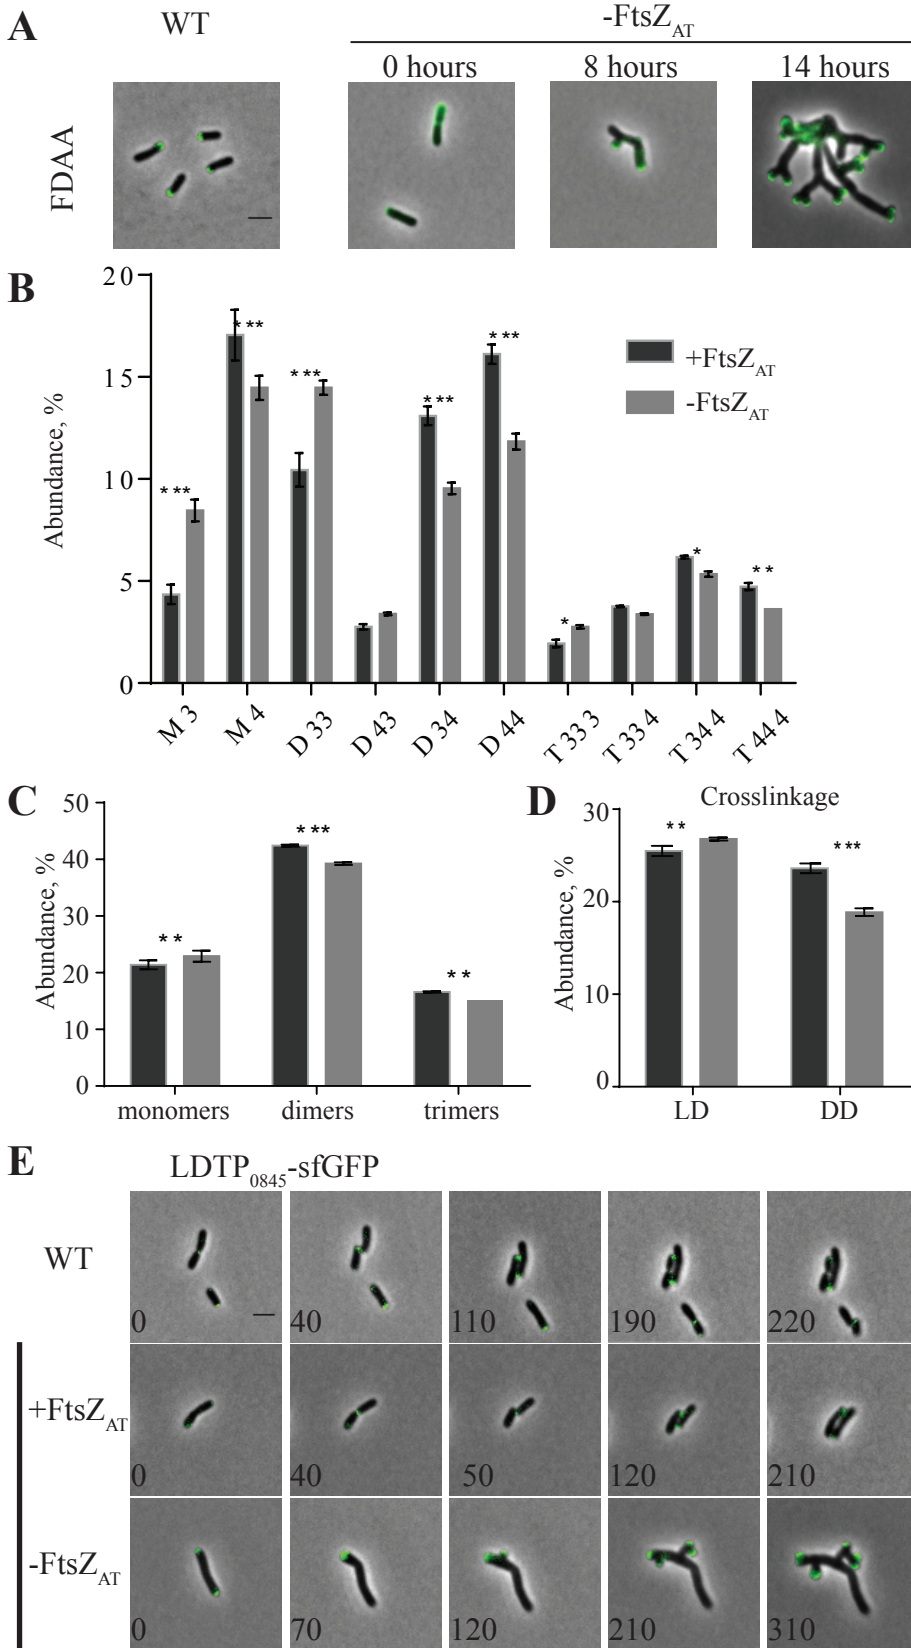

Figure 5

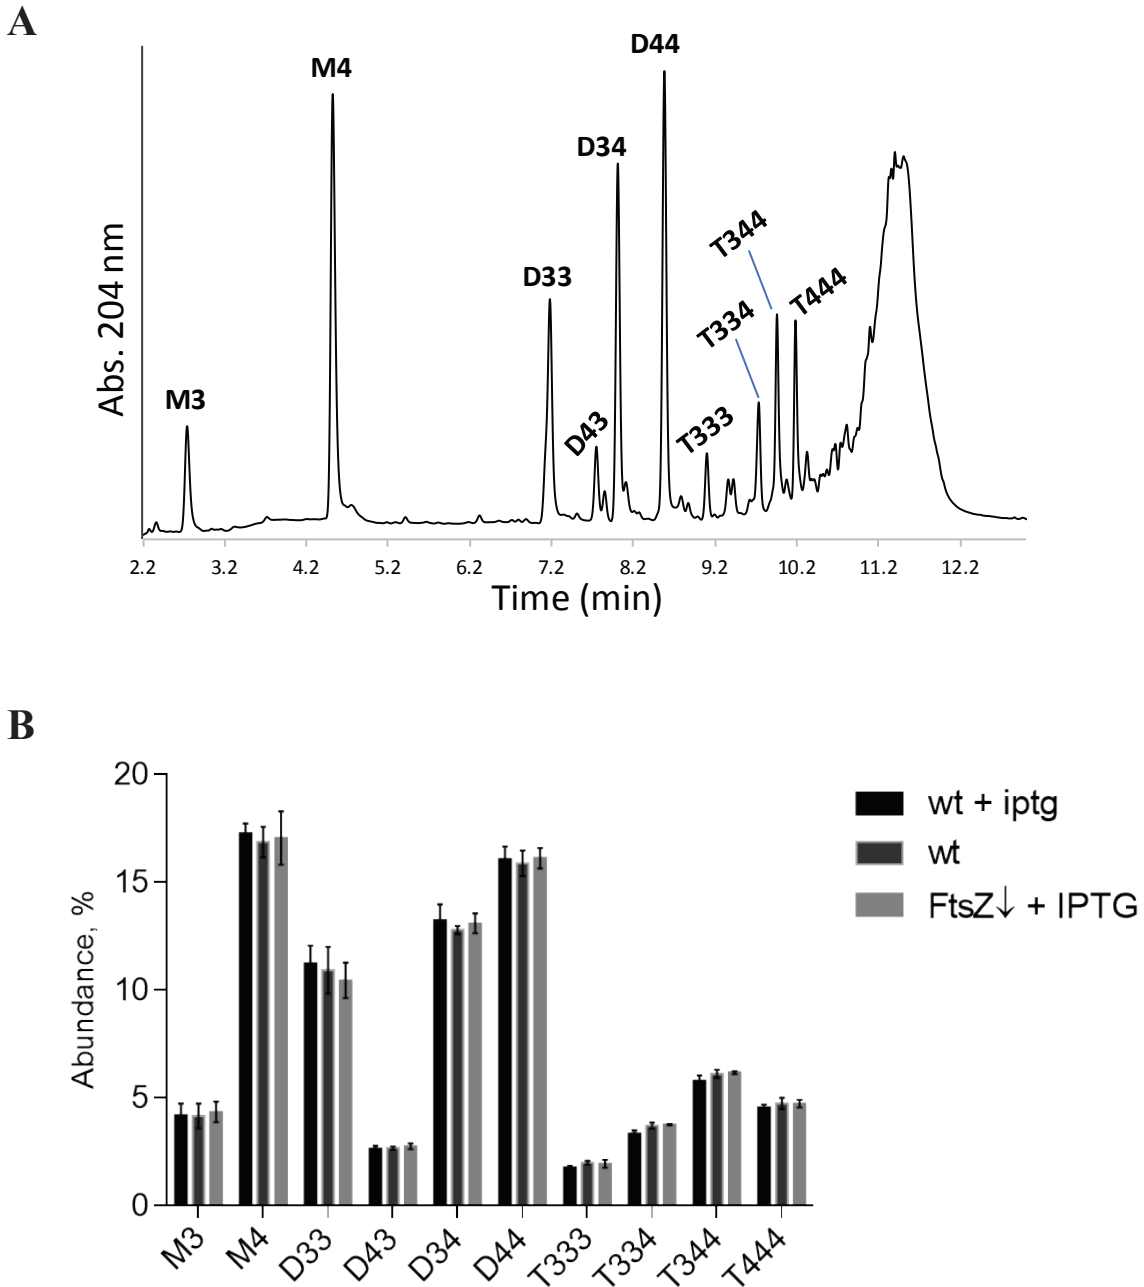

Figure 5- Figure Supplement 1

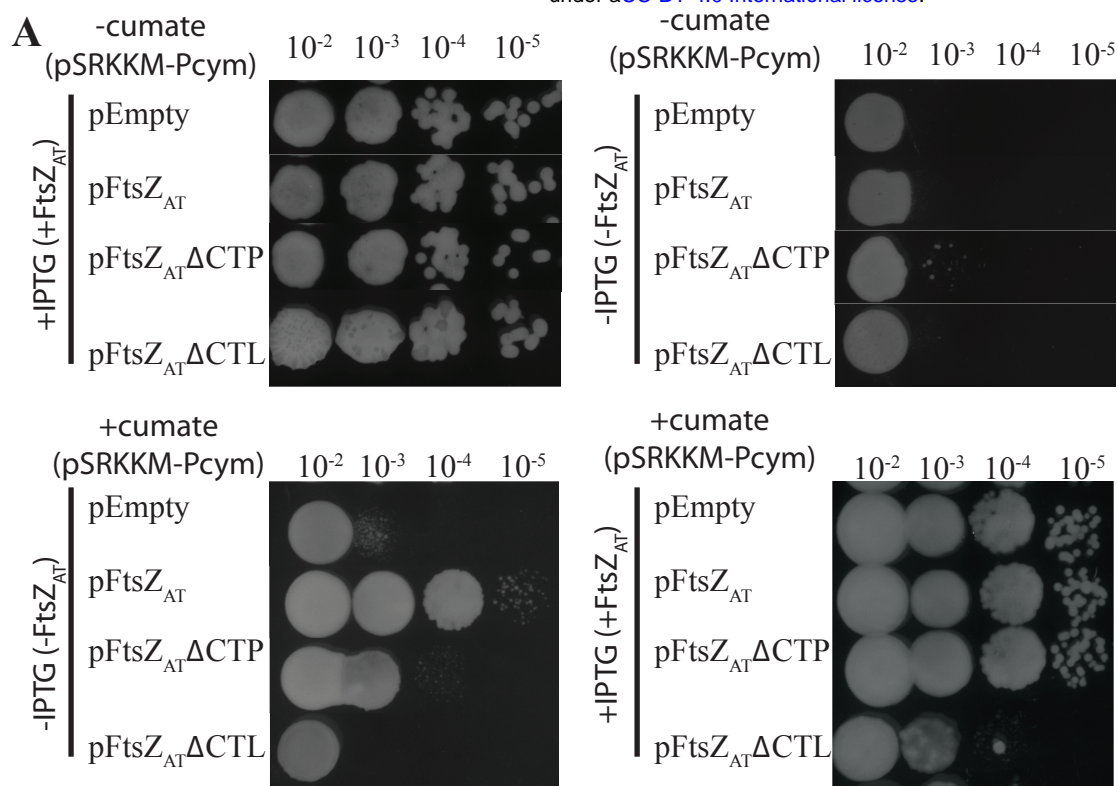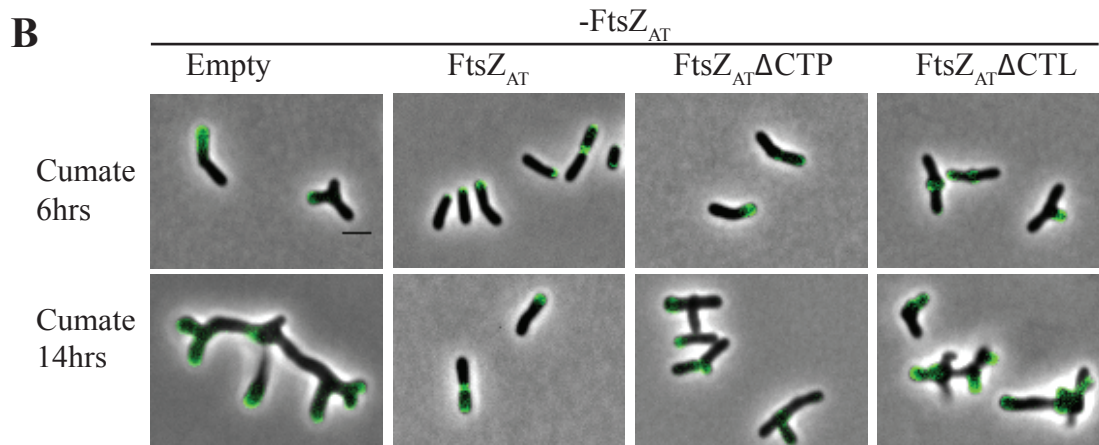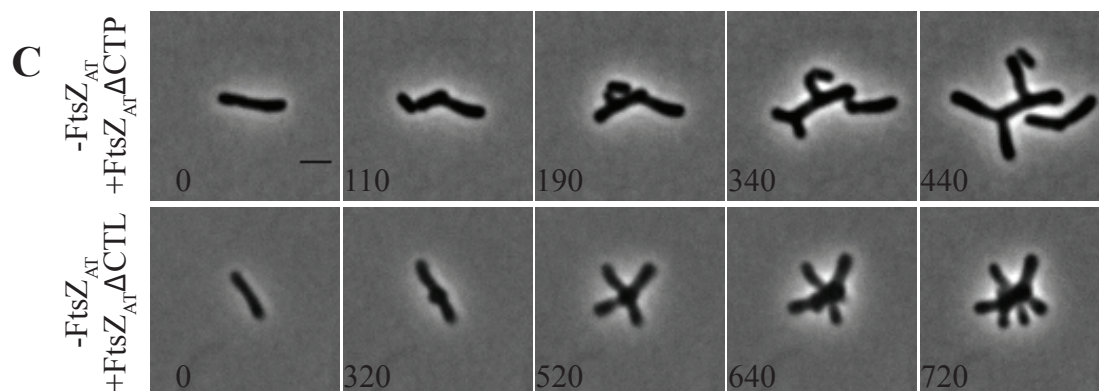

Figure 6

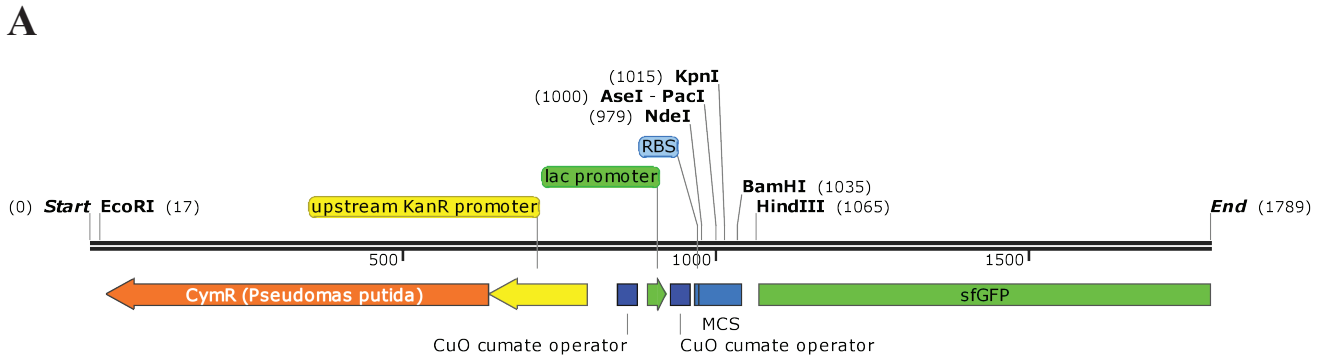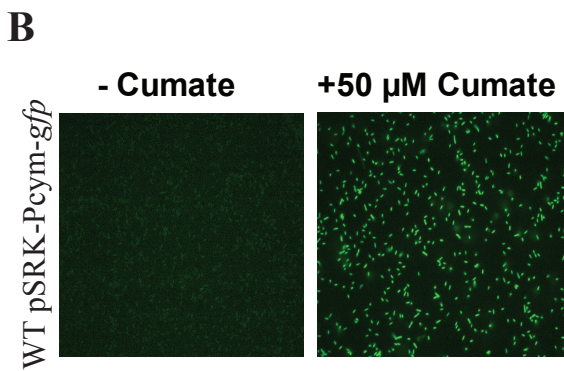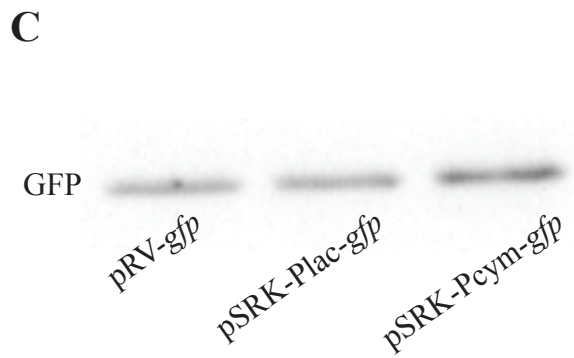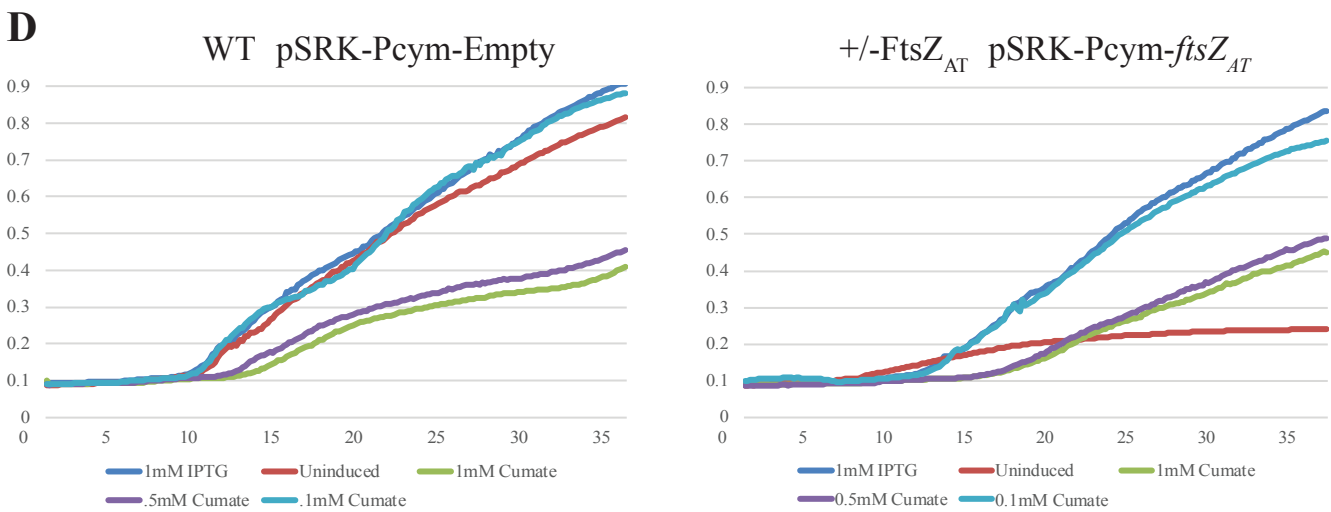

Figure 6- Figure Supplement 1

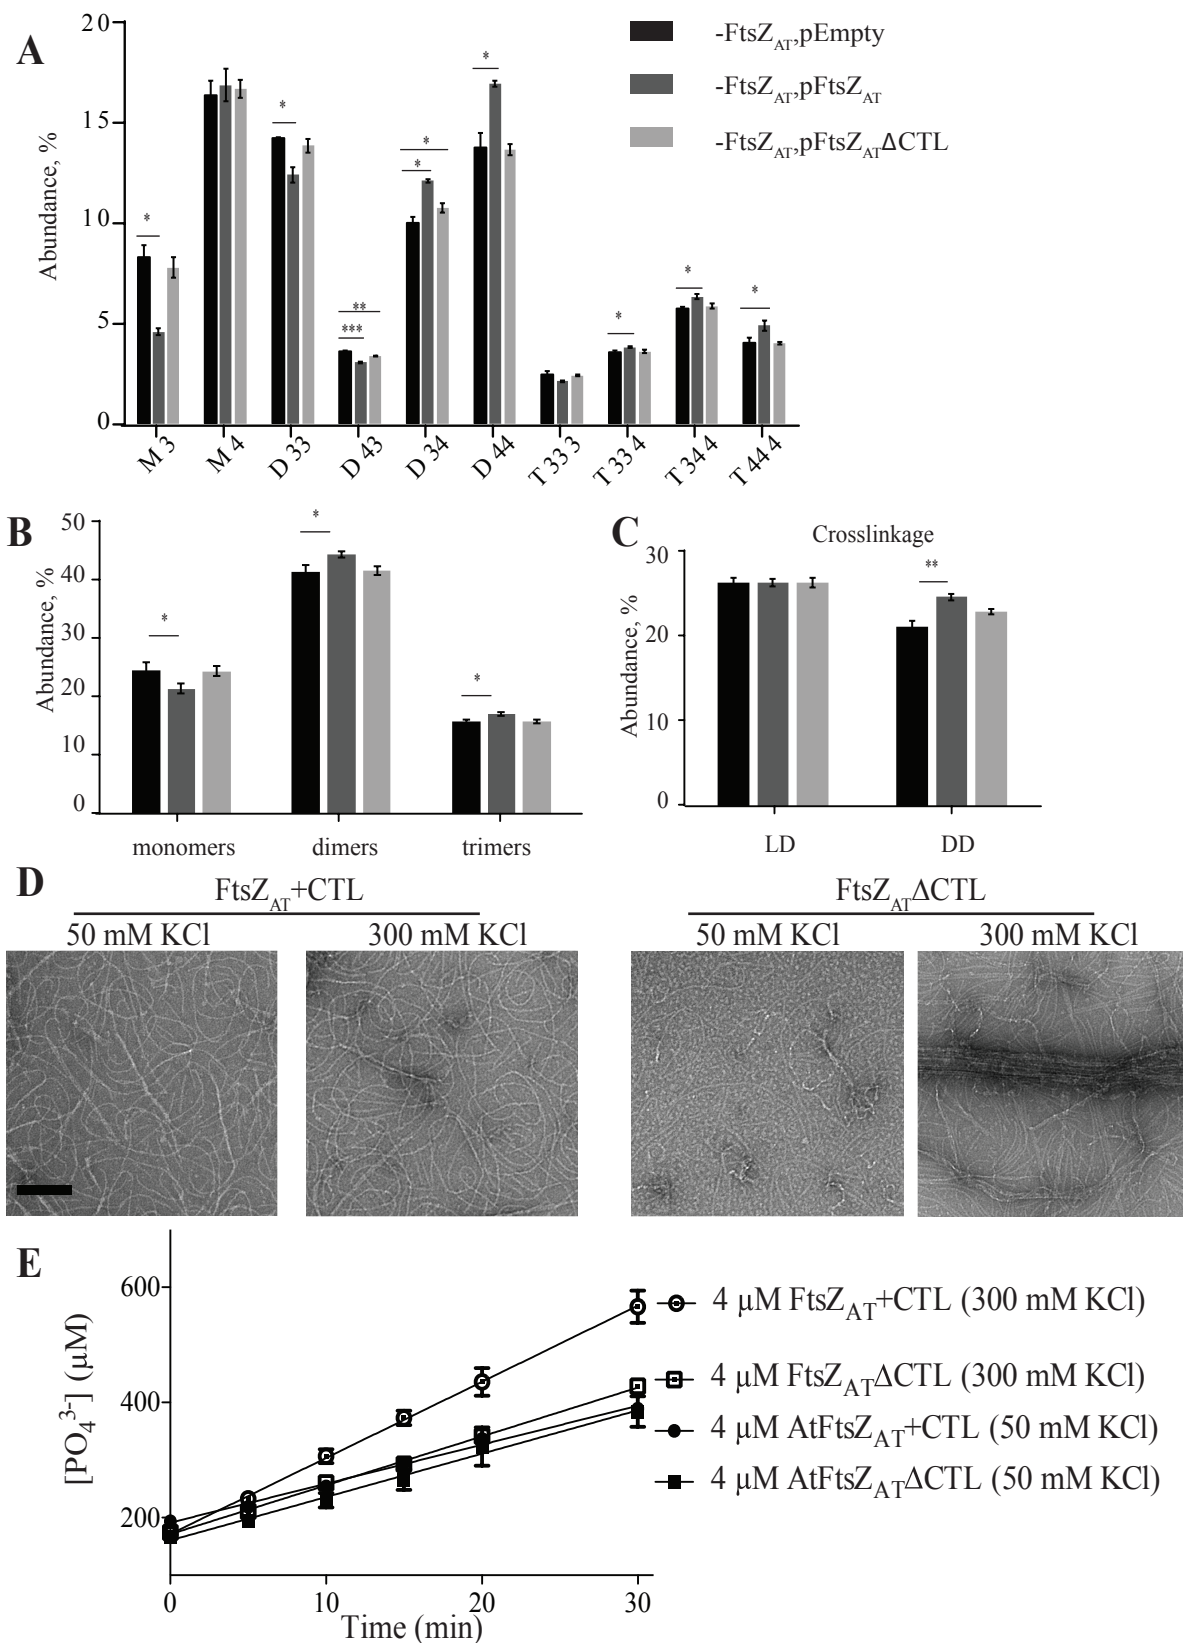

Figure 7

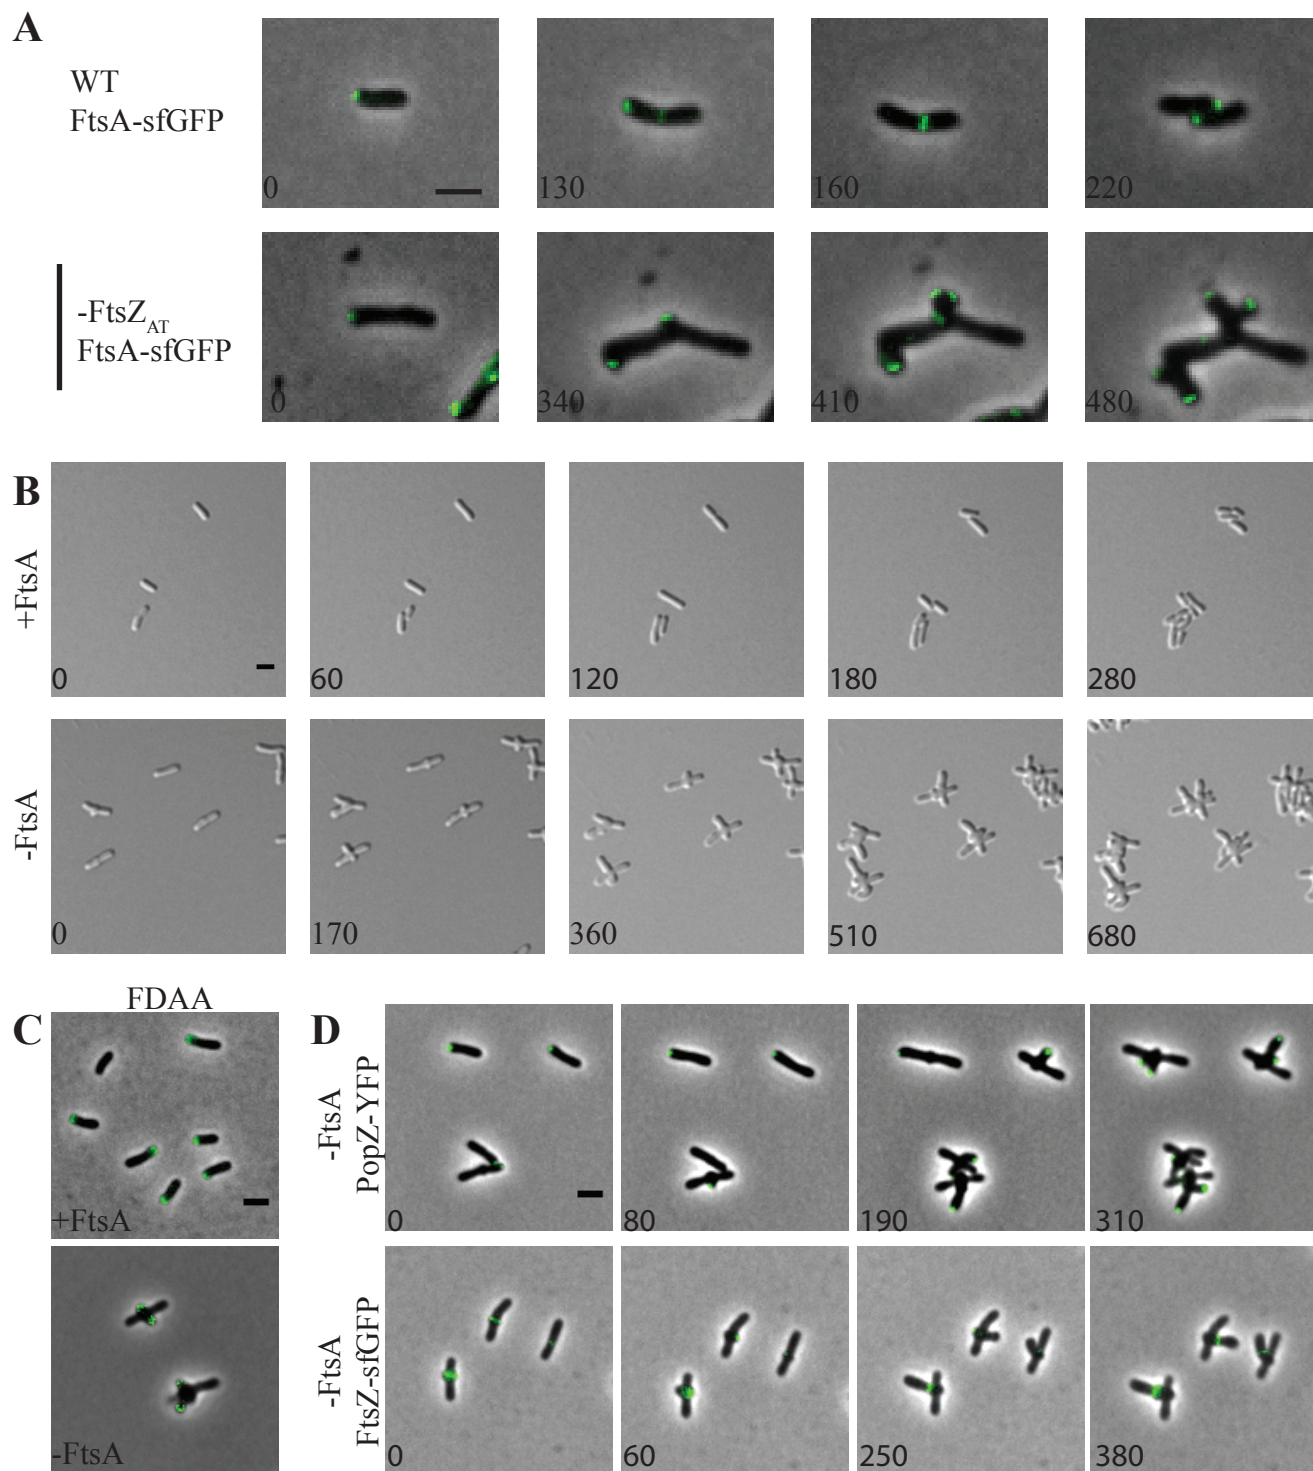

Figure 8

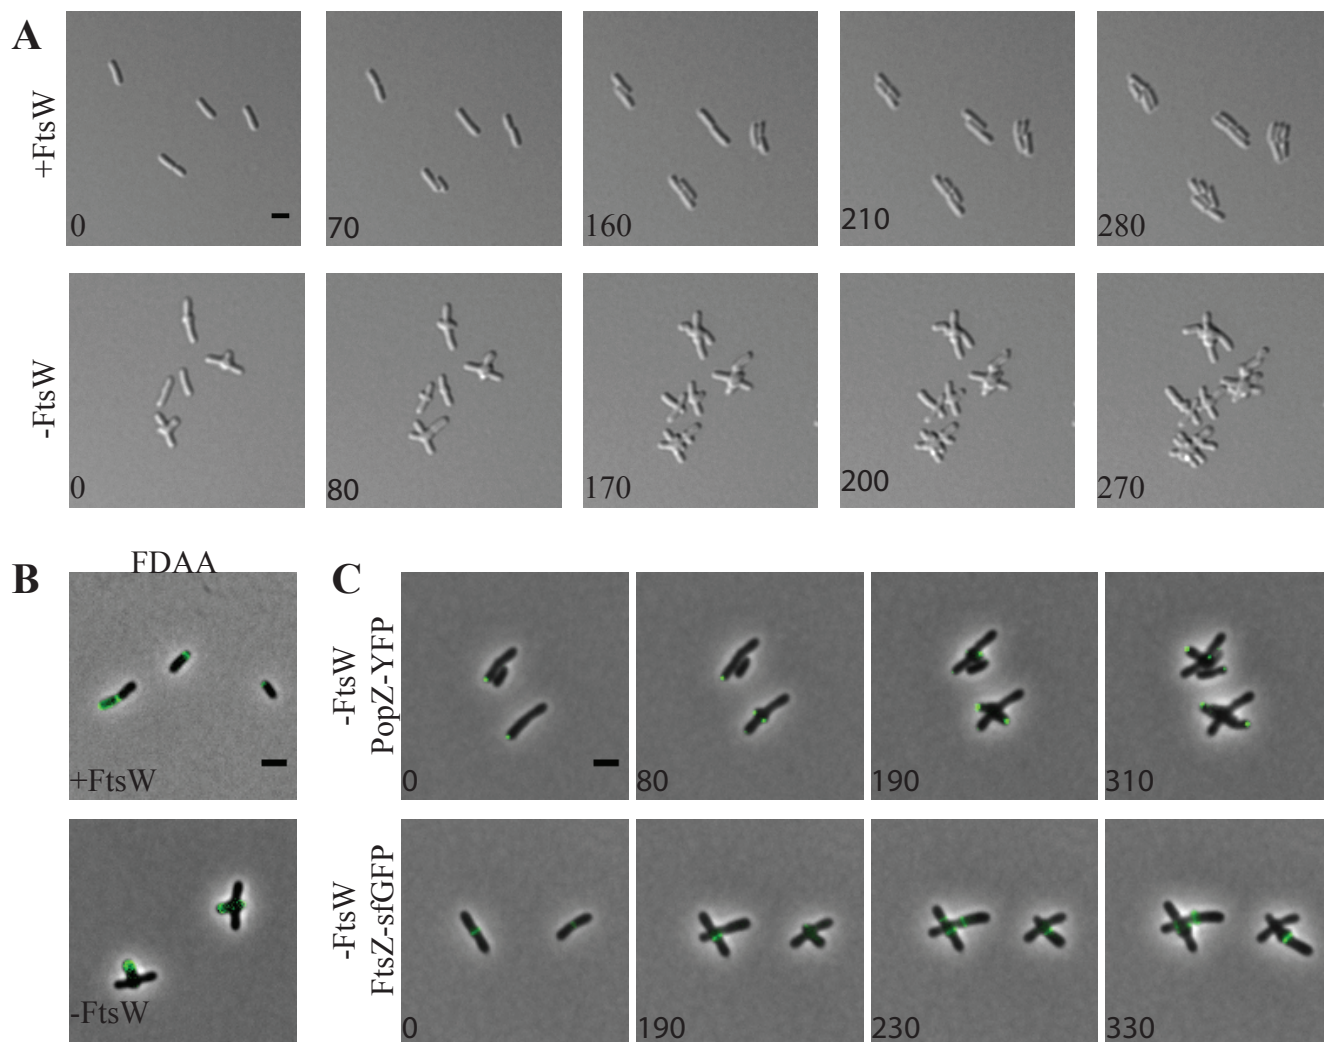

Figure 9
